# Supplementary material for: Marked synergy by vertical inhibition of EGFR signaling in NSCLC spheroids shows SOS1 is a therapeutic target in EGFR-mutated cancer
Source: eLife. 2020 Sep 8;9:e58204. doi: 10.7554/eLife.58204 (PMC7478890; doi:10.7554/eLife.58204)
Supplement: Figure 1—source data 1. [file elife-58204-fig1-data1.xlsx]

## Sheet: Fig 1A
Gefitinib Dose Curves
	H1975 3D			H1975 2D			HCC827 3D			HCC827 2D
	Trial 1	Trial 2	Trial 3	Trial 1	Trial 2	Trial 3	Trial 1	Trial 2	Trial 3	Trial 1	Trial 2	Trial 3
-7	77.793	86.885	82.207	82.004	90.282	93.645	1.298	2.258	1.425	29.079	28.163	28.756
-7.33	76.684	80.435	82.395	87.752	86.63	92.99	3.867	1.359	2.745	29.643	27.589	28.421
-7.67	73.838	77.125	82.574	92.784	88.056	90.984	3.156	2.542	2.756	23.843	42.766	32.221
-8	70.994	73.815	82.755	97.816	89.484	88.979	3.535	3.297	3.748	48.167	30.129	40.469
-8.33	86.975	72.387	92.207	87.821	91.361	93.044	4.236	5.4565	7.496	67.554	90.102	72.731
-8.67	83.185	74.831	96.103	92.354	93.742	96.5222	27.782	12.165	20.524	86.769	73.69	95.912
-9	79.396	77.277	99.254	96.887	96.123	100	50.767	62.268	46.38	84.598	90.011	84.525
-9.33	80.148	79.492	89.385	94.432	93.881	95.681	75.552	67.374	69.551	93.043	85.083	92.05
-9.67	80.901	81.709	78.771	91.977	91.639	91.363	101.258	94.319	98.467	91.965	99.785	95.922
-10	78.149	85.107	77.902	95.488	94.312	90.682	94.944	98.336	100	91.184	94.364	91.439
-10.33	75.398	88.507	77.034	97.358	102.452	90.528	82.423	88.755	85.983	94.313	95.111	91.244
-10.67	95.373	98.879	89.117	88.274	91.027	100.158	86.741	77.949	78.956	94.757	101.245	87.925
-11	102.345	93.88	84.117	101.543	88.468	89.965	82.961	87.053	74.701	85.403	85.246	88.88
Osimertinib Dose Curves
	H1975 3D			H1975 2D			HCC827 3D			HCC827 2D
	Trial 1	Trial 2	Trial 3	Trial 1	Trial 2	Trial 3	Trial 1	Trial 2	Trial 3	Trial 1	Trial 2	Trial 3
-7.33	3.151	4.068	2.995	22.522	33.3118	29.989	2.36849	3.05972	3.47141	11.8018	12.676	13.7942
-7.67	3.887	4.046	2.61	49.2174	56.0743	52.9001	2.04828	1.06226	1.29098	30.7548	30.0686	32.8996
-8	4.218	4.531	3.869	64.706	50.7655	51.7233	2.49555	2.66328	2.14485	43.4917	57.6874	33.3774
-8.33	23.713	35.072	31.574	78.3933	78.3133	74.1241	11.8018	12.676	13.7942	58.7294	82.2008	67.8475
-8.67	51.819	59.0389	55.696	66.8539	72.1247	74.7829	30.7548	30.0686	32.8996	58.3126	66.5413	62.4091
-9	68.126	53.449	54.458	76.6471	81.2895	74.941	43.4917	57.6874	33.3774	64.5997	72.615	72.5947
-9.33	82.537	82.454	78.0429	82.3368	92.7908	72.3456	58.7294	82.2008	67.8475	78.1449	74.831	74.2008
-9.67	70.388	75.937	78.7365	89.4432	87.0535	92.5451	58.3126	66.5413	62.4091	62.7548	67.4816	83.2834
-10	80.699	85.587	78.9029	81.1886	77.9762	94.9787	64.5997	72.615	72.5947	93.9924	100	76.061
-10.33	86.689	97.696	76.1703	88.99	88.5121	100	78.1449	74.831	74.2008	87.8526	91.9848	77.0419
-10.67	88.924	96.754	90.128	88.297	92.345	92.759	93.9924	100	76.061	82.6099	93.191	89.6129
-11	95.35	91.265	97.543	87.971	86.358	98.287	87.8526	91.9848	77.0419	85.4809	82.098	100.087
-11.33	94.1719	91.655	97.4378	94.257	81.587	85.1131	62.7548	67.4816	83.2834	82.3685	87.5222	97.3571

## Sheet: Fig 1B-D
	HCC827 2D proliferation
	NT			SOS1 KO			SOS2 KO					HCC827 3D spheroids
	Trial 1	Trial 2	Trial 3	Trial 1	Trial 2	Trial 3	Trial 1	Trial 2	Trial 3			NT	SOS1 KO	SOS2 KO
1	1	1	1	1	1	1	1	1	1		Trial 1	1.802	0.782	1.089
3	4.23726	4.09716	3.66442	2.95999	3.44004	3.62984	3.52266	3.30748	3.12475		Trial 2	1.664	0.581	1.471
5	10.7696	11.8799	10.5859	9.25515	9.02857	8.40292	8.98552	9.73295	10.5391		Trial 3	2.542	0.806	2.298
7	28.2705	19.8022	20.2914	26.127	21.0222	16.1756	23.7412	20.7698	16.2644		Trial 4	3.561	0.771	2.294
	H1975 2D proliferation
	NT			SOS1 KO			SOS2 KO					H1975 3D spheroids
	Trial 1	Trial 2	Trial 3	Trial 1	Trial 2	Trial 3	Trial 1	Trial 2	Trial 3			NT	SOS1 KO	SOS2 KO
1	1	1	1	1	1	1	1	1	1		Trial 1	5.122	1.98	3.682
3	2.97979	0.794972	2.38112	3.15301	1.21139	2.51805	3.25765	0.978292	2.42439		Trial 2	3.487	1.01	4.597
5	5.28747	5.60673	6.29794	5.20297	4.66888	6.28305	5.59075	5.18537	6.12557		Trial 3	4.269	1.503	2.723
7	6.61407	7.89543	10.3218	7.51324	7.29495	10.7095	7.91113	8.45199	11.1537		Trial 4	3.059	1.685	3.073
	PC9 3D spheroids					PC9-TM 3D spheroids					H3255 colonies (soft agar)					H3255-TM colonies (soft agar)
	NT	SOS1 KO	SOS2 KO			NT	SOS1 KO	SOS2 KO			NT	SOS1 KO	SOS2 KO			NT	SOS1 KO	SOS2 KO
Trial 1	10.044	5.992	8.808		Trial 1	4.111	2.581	3.971		Trial 1	133.25	22.5	66		Trial 1	143.5	26.25	53.5
Trial 2	9.538	6.628	8.831		Trial 2	3.952	2.642	3.805		Trial 2	175	14.75	68.25		Trial 2	91	18	56.25
Trial 3	11.154	7.02	11.144		Trial 3	4.152	2.576	3.873		Trial 3	183.5	20.25	86		Trial 3	124.75	16.75	78.75
Trial 4	10.806	6.731	9.929		Trial 4	2.92	2.732	3.763		Trial 4	189.25	28.5	56.75		Trial 4	113.75	22	43.5
P-values for 3D transformation assays (ANOVA), using Tukey's test for multiple comparisons
		HCC827	H1975	PC9	PC9-TM	3255	3255-TM
	NT v SOS1	0.0104	0.0032	0.0002	0.0032	<0.0001	<0.0001
	NT v SOS2	0.386	0.6635	0.4606	0.9586	<0.0001	0.001
	SOS1 v SOS2	0.0889	0.0115	0.0011	0.0022	0.0071	0.0195
								*

## Sheet: Fig 1E and 1F
BAY-293 Dose curves
	1975 3D			1975 2D					1975 NT						1975 SOS1 KO						1975 SOS2 KO
	Trial 1	Trial 2	Trial 3	Trial 1	Trial 2	Trial 3			Trial 1	Trial 2	Trial 3	Trial 4	Trial 5	Trial 6	Trial 1	Trial 2	Trial 3	Trial 4	Trial 5	Trial 6	Trial 1	Trial 2	Trial 3	Trial 4	Trial 5	Trial 6
-5.33	23.829	23.051	22.628	43.089	37.799	38.292			22.657	25	22.102	24	24.256	21	85.567	74.564	93.145	56.662	71	69.669	1.25	1.951	1.95	2.254	1.122	2.12
-5.67	36.38	36.405	43.17	73.113	67.001	78.186			29.284	43.475	33.895	38.914	39.481	46.859	54.636	82.813	78.51	52.527	72.357	72.805	2.74	3.421	2.001	3.636	2.574	2.607
-6	44.217	48.064	49.226	84.899	83.625	82.009			41.345	47.089	49.419	46.709	55.041	43.41	95.725	77	70.927	75.592	61.294	65.829	13.898	8.095	10.843	8.933	7.754	9.581
-6.33	51.742	77.561	72.644	88.773	89.818	85.855			51.807	75.678	63.481	73.641	50.731	88.556	85.702	47.588	55.402	89.24	91.999	92	36.671	24.541	44.267	28	28.692	31.49
-6.67	74.645	89.246	60.03	92.779	87.238	86.725			63.33	87.961	91.481	73.01	75.004	57.056	85.153	81.586	66.089	90.641	67.345	75.924	34.994	33.732	36	42.067	44.99	54.271
-7	73.428	86.683	76.585	90.817	87.361	83.255			75.857	77	76.366	71	76	77.169	62.594	74.509	78.221	77	80.661	81.802	51.407	94.081	55.442	70.502	42.939	70.303
-7.33	72.139	95.551	90.601	90.643	88.722	90.492			71.368	98.91	91	72.102	90	93.202	79.174	74.581	91	92.447	75	97.025	98.647	82.773	95.002	100	67.173	85.596
-7.67	98.978	83.608	91.774	99.784	95.264	99.774			97.956	100	84.189	83.027	99.152	84.397	83.088	74.495	90.367	84	85.341	82.886	89.132	79.452	74.579	81	71.972	65.496
-8	90.954	88.248	68.514	91.167	83.567	85.82			97.311	84.598	96.336	80.159	67.331	69.697	97.198	83.001	92.865	78.914	67.548	77.267	95.973	79.602	84.325	87.638	75.102	65.803
-8.33	80.869	70.394	95.793	95.811	89.808	100			87.416	74.322	60.627	90.162	82.318	99.269	76.574	89.385	94.512	84.806	100	69.266	88.369	85.172	70.17	75.392	82.006	72.188
