# Supplementary material for: Marked synergy by vertical inhibition of EGFR signaling in NSCLC spheroids shows SOS1 is a therapeutic target in EGFR-mutated cancer
Source: eLife. 2020 Sep 8;9:e58204. doi: 10.7554/eLife.58204 (PMC7478890; doi:10.7554/eLife.58204)
Supplement: Figure 2—source data 1. [file elife-58204-fig2-data1.xlsx]

## Sheet: Fig 2E
	2D Isobologram data												3D Isobologram Data
	Osimertinib	100	80	66	50	34	20	0				Osimertinib	100	80	66	50	34	20	0
	BAY-293	0	20	34	50	66	80	100				BAY-293	0	20	34	50	66	80	100
Osimertinib IC50	Trial 1	2.518	3.0072	1.7732	0.914	0.49875	0.2394	0	X values		Osimertinib IC50	Trial 1	2.622	0.6716	0.453375	0.46055	0.5201	0.2374	0
	Trial 2	2.844	2.7912	2.17945	1.347	1.0381	0.8062	0				Trial 2	2.86	0.840075	0.66525	0.52942	0.50152	0.546075	0
	Trial 3	2.214	2.2704	2.3153	1.2795	0.96705	0.6786	0				Trial 3	2.612	0.888975	0.57633	0.48923	0.66695	0.623175	0
	Average	2.52533	2.6896	2.08932	1.18017	0.834633	0.574733	0				Average	2.698	0.800217	0.564985	0.493067	0.562857	0.468883	0
	SD	0.315064	0.378762	0.282066	0.232965	0.293045	0.297333	0				SD	0.140385	0.114037	0.106392	0.0345949	0.0906249	0.204143	0
BAY-293 IC50	Trial 1	0	1.5238	2.541	2.9275	4.1899	7.1416	7.209	Y values		BAY-293 IC50	Trial 1	0	0.04845	0.077695	0.12544	0.27408	0.60091	1.491
		0	1.2356	2.7076	2.7675	3.9026	5.9904	5.425				Trial 2	0	0.05268	0.06254	0.13043	0.42373	0.681747	1.904
		0	2.07313	3.2172	3.3105	4.13162	5.85973	5.95967				Trial 3	0	0.10131	0.143917	0.266123	0.55457	0.705953	1.737
	Average	0	1.61084	2.82193	3.00183	4.07471	6.33058	6.19789				Average	0	0.06748	0.0947172	0.173998	0.41746	0.66287	1.71067
	SD	0	0.425497	0.352301	0.279027	0.15187	0.705398	0.915547				SD	0	0.0293739	0.0432765	0.0798221	0.14035	0.0550068	0.207755
Combination Index	Osimertinib		80	66	50	34	20				Combination Index	Osimertinib		80	66	50	34	20
	BAY-293		20	34	50	66	80					BAY-293		20	34	50	66	80
	Trial 1		1.85396	1.54368	1.17071	1.01835	0.942969					Trial 1		0.404643	0.336787	0.443504	0.646222	0.457238
	Trial 2		1.19281	1.11881	0.879718	0.946218	1.27412					Trial 2		0.368011	0.253494	0.255804	0.477888	0.596642
	Trial 3		1.25323	1.54485	1.08805	1.15616	1.41073					Trial 3		0.366294	0.291665	0.322851	0.49443	0.54928
	Average		1.43333	1.40245	1.04616	1.04024	1.20927					Average		0.379649	0.293982	0.34072	0.539513	0.534387
	SD		0.365521	0.245637	0.14995	0.10667	0.240527					SD		0.0216622	0.041695	0.0951175	0.092782	0.0708855
	T-Statistic		2.05338	2.83775	0.53318	0.653449	1.50699					T-Statistic		-49.6015	-29.3286	-12.0052	-8.59634	-11.377
	Significant?		no	no	no	no	no					Significant?		yes	yes	yes	yes	yes
	*** For significance on a 1-tailed T Test with an alpha=0.05 , a T-value < -2.919986 indicates significance with a sample size of 3

## Sheet: Fig 2IJK - 2D Data
2D Data
	Heat map																Bliss Index														Excess over Bliss
Trial 1			-8	-7.67	-7.33	-7	-6.67	-6.33	-6	-5.67	-5.33	-5	BAY Dose				-8	-7.67	-7.33	-7	-6.67	-6.33	-6	-5.67	-5.33	-5	BAY Dose				-8	-7.67	-7.33	-7	-6.67	-6.33	-6	-5.67	-5.33	-5	BAY Dose
			90.5441	99.3143	90.8495	92.6947	91.8967	87.0622	73.036	41.4157	0.7855	0.1065
	-10.33	91.6661	96.1911	96.8021	99.7338	95.5975	92.5316	57.3496	56.3228	47.0467	0.8025	0.1275			-10.33		4.4637	2.8026	62.8208	3.414	2.1105	0.4735	0.7567	1.1715	1.0008	1.0003			-10.33		-13.1929	-5.7646	-16.4556	-10.6279	-8.2935	22.4569	10.6264	-9.0825	-0.0825	-0.0299
	-10	93.6397	95.7935	96.0635	98.8663	94.1106	94.9214	68.347	62.0556	42.2974	0.7093	0.0701			-10		3.6169	1.7788	13.1684	2.2415	2.7465	0.5837	0.833	1.0609	0.9997	0.9997			-10		-11.0082	-3.0659	-13.7951	-7.3115	-8.8696	13.1778	6.3351	-3.5159	0.0262	0.0296
	-9.67	98.78	94.4819	98.6472	100	95.8796	92.0826	62.6895	58.6492	42.6314	0.7359	0.0832			-9.67		1.9138	1.4025	10.2589	2.0474	1.1651	0.3752	0.6736	1.03	0.9996	0.9998			-9.67		-5.0424	-0.5446	-10.2589	-4.3157	-1.307	23.3104	13.4958	-1.721	0.04	0.022
	-9.33	95.4169	92.4676	98.4211	99.3169	93.8715	91.7184	62.7349	54.3335	43.9758	0.6193	0.1034			-9.33		1.8063	3.3172	19.4904	1.8852	1.487	0.4543	0.6638	1.0796	0.9987	1			-9.33		-6.0732	-3.6585	-12.6311	-5.4251	-4.0334	20.3371	15.3553	-4.4582	0.1301	-0.0018
	-9	87.9921	91.2022	92.7688	95.8327	90.8303	86.5608	60.08	56.0824	43.1273	0.7675	0.0564			-9		2.3106	1.744	4.8136	2.0105	1.4241	0.586	0.8137	1.1175	1.0008	0.9996			-9		-11.5305	-5.38	-15.8923	-9.2662	-5.6989	16.5278	8.1836	-6.6847	-0.0763	0.0373
	-8.67	87.2903	87.688	87.7771	89.6123	84.3251	86.2161	58.0658	55.4398	42.1373	0.8906	0.0847			-8.67		1.7027	1.0888	1.9925	1.2176	1.4352	0.5724	0.8134	1.1034	1.0021	0.9999			-8.67		-8.6517	-1.0853	-10.3095	-3.4116	-5.9991	17.9311	8.3136	-5.9853	-0.205	0.0082
	-8.33	79.8754	74.1855	77.796	80.2212	76.8038	74.1916	53.402	47.5613	33.8366	0.2153	0.0376			-8.33		1.0722	0.931	1.387	1.1191	1.0306	0.6536	0.7945	1.0114	0.9959	0.9995			-8.33		-1.863	1.5317	-7.6548	-2.7635	-0.7887	16.1393	10.7766	-0.7556	0.4122	0.0475
	-8	54.9991	59.7184	55.5429	56.6428	52.9214	54.8774	36.1174	31.4464	18.0912	0.1192	0.0385			-8		1.2463	1.0207	1.154	1.0412	1.0961	0.8158	0.8728	0.9428	0.9969	0.9998			-8		-9.92	-0.921	-6.6764	-1.9402	-4.3351	11.766	8.7227	4.687	0.3129	0.02
	-7.67	42.2535	41.4993	41.5881	43.7175	41.8123	44.3671	22.6857	21.0281	12.1171	0.1305	0.0368			-7.67		1.0554	0.9936	1.0947	1.0455	1.0995	0.8176	0.8755	0.9388	0.998	0.9999			-7.67		-3.2412	0.3757	-5.3304	-2.6455	-5.5374	14.1012	9.8322	5.3825	0.2014	0.0081
	-7.33	36.2974	36.6695	34.9775	36.7799	34.8819	36.132	16.0603	14.156	9.0298	0.1243	0.032			-7.33		1.0601	0.9835	1.0602	1.019	1.0435	0.8149	0.8561	0.934	0.9984	0.9999			-7.33		-3.8043	1.071	-3.8039	-1.2361	-2.7759	15.541	12.3542	6.0031	0.1608	0.0067
	OSM Dose														OSM Dose														OSM Dose
Trial 2			-8	-7.67	-7.33	-7	-6.67	-6.33	-6	-5.67	-5.33	-5	BAY Dose				-8	-7.67	-7.33	-7	-6.67	-6.33	-6	-5.67	-5.33	-5	BAY Dose				-8	-7.67	-7.33	-7	-6.67	-6.33	-6	-5.67	-5.33	-5	BAY Dose
			100	95.9437	93.1093	91.6223	90.4025	88.8366	89.6803	68.8329	3.3412	0.425
	-10.33	93.0857	92.4913	90.6986	95.8091	92.9925	95.6873	96.2923	90.8094	65.6808	1.9147	0.2689			-10.33		0.9208	1.1493	3.1804	2.0996	3.6747	4.6675	1.7975	1.0468	0.9878	0.9987			-10.33		0.5944	-1.3887	-9.1377	-7.7053	-11.5355	-13.5981	-7.3299	-1.6072	1.1954	0.1267
	-10	92.5667	91.6034	88.4874	93.5911	92.3607	96.19	91.598	83.4791	64.7129	2.5243	0.3614			-10		0.8853	0.9718	2.1551	1.9882	4.2828	2.1146	1.0281	1.0282	0.9942	0.9997			-10		0.9634	0.3246	-7.4028	-7.5489	-12.5074	-9.3648	-0.465	-0.9965	0.5686	0.032
	-9.67	94.0611	93.3847	94.9046	94.7781	91.8631	98.0379	91.1076	88.4578	64.0877	2.6931	0.3108			-9.67		0.8977	1.9143	2.3785	1.6983	7.6279	16.4392	1.3555	0.9817	0.9954	0.9991			-9.67		0.6764	-4.6588	-7.1984	-5.6822	-13.0043	-7.5469	-4.1035	0.6573	0.4497	0.089
	-9.33	93.5149	88.4947	93.2363	87.5832	91.3931	92.8863	92.4936	87.5873	63.384	2.5184	0.333			-9.33		0.5637	1.5196	1.0412	1.6637	2.1733	2.2547	1.2999	0.9731	0.9938	0.9994			-9.33		5.0203	-3.5145	-0.5122	-5.7126	-8.3465	-9.418	-3.7229	0.9851	0.6061	0.0644
	-9	93.3979	90.3801	90.9615	88.6667	91.627	92.3422	91.0252	82.4699	64.1834	2.6938	0.3377			-9		0.6863	1.1496	1.1504	1.723	2.0327	1.8974	0.9264	0.9971	0.9956	0.9994			-9		3.0178	-1.3521	-1.7046	-6.0537	-7.9082	-8.0537	1.2896	0.1051	0.4268	0.0592
	-8.67	91.5569	88.193	89.5394	86.063	88.1251	84.9265	86.0328	82.5422	61.4699	2.164	0.287			-8.67		0.7151	1.1622	1.0585	1.3569	1.1431	1.3363	1.0248	0.9597	0.9909	0.999			-8.67		3.3639	-1.6963	-0.815	-4.2385	-2.1568	-4.6967	-0.4338	1.5513	0.8951	0.1021
	-8.33	85.3746	81.1623	81.3393	77.7437	79.9457	84.5734	81.6963	75.8013	55.2224	1.3832	0.2052			-8.33		0.7764	0.9693	0.9215	1.0859	1.4792	1.3197	0.9685	0.9209	0.9851	0.9984			-8.33		4.2123	0.5722	1.748	-1.7235	-7.3927	-5.8524	0.7628	3.5434	1.4694	0.1576
	-8	68.4752	66.3635	65.9442	63.8557	64.7513	64.5942	66.5271	58.9255	36.4718	0.8693	0.1386			-8		0.9372	1.0072	1.0027	1.0571	1.076	1.1702	0.9395	0.8322	0.9857	0.9985			-8		2.1117	-0.2465	-0.0989	-2.0128	-2.6909	-5.696	2.4832	10.6617	1.4186	0.1524
	-7.67	54.0066	51.3629	51.0041	49.9474	49.7442	52.1422	52.392	48.5329	27.6981	0.5034	0.1357			-7.67		0.9456	0.9834	0.9933	1.0052	1.0693	1.0927	1.0019	0.8689	0.9869	0.9991			-7.67		2.6437	0.8118	0.3377	-0.2622	-3.3189	-4.4143	-0.0997	9.4762	1.301	0.0939
	-7.33	44.9405	45.604	47.4195	42.9837	45.598	44.8932	43.4392	42.2438	22.2557	0.2003	0.1101			-7.33		1.0122	1.0818	1.02	1.0813	1.0774	1.0622	1.0336	0.8884	0.987	0.9992			-7.33		-0.6635	-4.3019	-1.1399	-4.4224	-4.2659	-3.5155	-1.941	8.6782	1.3013	0.0809
	OSM Dose														OSM Dose														OSM Dose
Trial 3			-8	-7.67	-7.33	-7	-6.67	-6.33	-6	-5.67	-5.33	-5	BAY Dose				-8	-7.67	-7.33	-7	-6.67	-6.33	-6	-5.67	-5.33	-5	BAY Dose				-8	-7.67	-7.33	-7	-6.67	-6.33	-6	-5.67	-5.33	-5	BAY Dose
			89.1696	89.1762	88.0914	87.3289	85.1781	84.6285	79.203	53.9924	4.654	0.8718
	-10.33	96.3483	85.4671	88.7439	85.906	83.6645	82.667	83.746	80.216	50.1818	3.1678	0.9821			-10.33		0.9693	1.2509	1.0732	0.9709	1.0346	1.1358	1.1974	0.9631	0.9864	1.0014			-10.33		0.4463	-2.8241	-1.0315	0.4754	-0.5993	-2.2078	-3.9053	1.8389	1.3163	-0.1421
	-10	97.2955	90.4876	87.8791	85.3955	84.1835	84.6974	83.2816	80.2396	53.1339	3.3325	0.9038			-10		1.3921	1.092	0.9785	0.9505	1.1191	1.0563	1.1609	1.0128	0.9876	1.0006			-10		-3.7296	-1.1146	0.3134	0.7836	-1.8229	-0.9418	-3.1787	-0.6018	1.1957	-0.0556
	-9.67	100	90.7075	86.4552	84.2964	82.4044	84.7484	84.5023	81.1898	58.2192	4.6221	1.1462			-9.67		1.1655	0.7991	0.7583	0.7201	0.9718	15.3715	1.1056	1.1012	0.9997	1.0028			-9.67		-1.5379	2.721	3.7949	4.9245	0.4297	0.1262	-1.9868	-4.2269	0.0319	-0.2744
	-9.33	97.6971	88.577	84.545	88.7274	82.5037	86.2792	80.7127	75.7664	49.3972	4.4027	1.0835			-9.33		1.1279	0.8332	1.2364	0.8392	1.2232	0.898	0.9335	0.9338	0.9985	1.0023			-9.33		-1.4609	2.5775	-2.6647	2.8142	-3.0627	1.9669	1.6126	3.3517	0.1441	-0.2318
	-9	94.7213	86.1613	86.0316	84.0437	79.9834	80.5433	83.0725	83.8826	54.8378	3.9812	1.0742			-9		1.1227	1.1119	1.0378	0.8633	0.9929	1.172	1.5497	1.0818	0.9956	1.0025			-9		-1.6987	-1.5627	-0.6024	2.7357	0.1386	-2.9112	-8.8605	-3.6955	0.4271	-0.2484
	-8.67	95.174	84.5182	80.0007	77.3486	74.8324	75.2116	74.7597	73.201	49.9448	3.9214	0.7967			-8.67		0.9775	0.7564	0.7134	0.6709	0.7638	0.7708	0.9187	0.9712	0.9947	0.9997			-8.67		0.3481	4.8719	6.4915	8.282	5.8559	5.7847	2.1796	1.4419	0.508	0.033
	-8.33	81.6679	76.8684	73.8927	70.6194	69.5408	72.9253	71.1462	68.3279	46.9005	2.4856	0.782			-8.33		1.1749	1.0408	0.955	0.9416	1.1242	1.0704	1.1151	1.0528	0.9865	1.0007			-8.33		-4.0454	-1.0644	1.323	1.7789	-3.3621	-2.0319	-3.6445	-2.8061	1.3152	-0.07
	-8	67.2359	64.2623	61.0614	55.8951	58.4087	61.9168	59.5837	55.3092	33.5457	1.4804	0.6411			-8		1.1206	1.0283	0.9244	0.9926	1.122	1.0664	1.046	0.9585	0.9833	1.0006			-8		-4.3083	-1.1029	3.3339	0.3077	-4.6465	-2.6829	-2.0564	2.7566	1.6488	-0.0549
	-7.67	54.9985	48.2648	49.7532	49.6283	50.7496	48.6537	47.2686	44.0231	23.4517	1.0524	0.6533			-7.67		0.985	1.0141	1.0234	1.0552	1.0352	1.0137	1.0083	0.9184	0.9848	1.0017			-7.67		0.7771	-0.7076	-1.1794	-2.7201	-1.8071	-0.7242	-0.4627	6.2433	1.5072	-0.1738
	-7.33	47.3089	46.3303	45.3099	45.1744	47.2765	43.8363	43.5385	37.118	15.7076	0.8687	0.6283			-7.33		1.0772	1.0571	1.0638	1.1131	1.063	1.062	0.9944	0.8833	0.9866	1.0022			-7.33		-4.1452	-3.1216	-3.4993	-5.9622	-3.5395	-3.5017	0.3521	9.8356	1.3331	-0.2159
	OSM Dose														OSM Dose														OSM Dose
Average			-8	-7.67	-7.33	-7	-6.67	-6.33	-6	-5.67	-5.33	-5	BAY Dose				-8	-7.67	-7.33	-7	-6.67	-6.33	-6	-5.67	-5.33	-5	BAY Dose				-8	-7.67	-7.33	-7	-6.67	-6.33	-6	-5.67	-5.33	-5	BAY Dose
			93.2379	94.8114	90.6834	90.5486	89.1591	86.8424	80.6398	54.747	2.9269	0.4678					-8	-7.67	-7.33	-7	-6.67	-6.33	-6	-5.67	-5.33	-5					-8	-7.67	-7.33	-7	-6.67	-6.33	-6	-5.67	-5.33	-5
	-10.33	93.7	91.3832	92.0815	93.8163	90.7515	90.2953	79.1293	75.7827	54.3031	1.9617	0.4595			-10.33	-10.33	2.118	1.7343	22.3581	2.1615	2.2733	2.0923	1.2505	1.0605	0.9917	1.0002			-10.33	-10.33	-4.0507	-3.3258	-8.875	-5.9526	-6.8094	2.217	-0.2029	-2.9503	0.8098	-0.0151
	-10	94.5006	92.6281	90.81	92.6176	90.2183	91.9363	81.0755	75.2581	53.3814	2.1887	0.4451			-10	-10	1.9648	1.2809	5.434	1.7267	2.7161	1.2515	1.0073	1.034	0.9938	1			-10	-10	-4.5915	-1.2853	-6.9615	-4.6923	-7.7333	0.957	0.8971	-1.7047	0.5968	0.002
	-9.67	97.6137	92.858	93.3357	93.0248	90.049	91.623	79.4332	76.0989	54.9794	2.6837	0.5134			-9.67	-9.67	1.3257	1.372	4.4652	1.4886	3.2549	10.7286	1.0449	1.0376	0.9982	1.0006			-9.67	-9.67	-1.968	-0.8275	-4.5541	-1.6911	-4.6272	-3.7103	2.4685	-1.7635	0.1739	-0.0545
	-9.33	95.543	89.8464	92.0675	91.8758	89.2561	90.2947	78.6471	72.5624	52.2523	2.5135	0.5066			-9.33	-9.33	1.1659	1.89	7.256	1.4627	1.6278	1.2023	0.9657	0.9955	0.997	1.0006			-9.33	-9.33	-0.8379	-1.5318	-5.2693	-2.7745	-5.1475	-3.7256	-1.0552	-0.0405	0.2934	-0.0564
	-9	92.0371	89.2479	89.9206	89.5144	87.4802	86.4821	78.0592	74.1449	54.0495	2.4808	0.4894			-9	-9	1.3732	1.3352	2.3339	1.5323	1.4832	1.2184	1.0966	1.0655	0.9973	1.0005			-9	-9	-3.4038	-2.7649	-6.0664	-4.1947	-4.4895	-5.4824	-3.7854	-3.425	0.2592	-0.0506
	-8.67	91.3404	86.7997	85.7724	84.3413	82.4275	82.118	72.9527	70.3943	51.184	2.3253	0.3895			-8.67	-8.67	1.1318	1.0025	1.2548	1.0818	1.114	1.0535	0.9718	1.0115	0.9959	0.9995			-8.67	-8.67	-1.6466	0.6967	-1.5443	0.2106	-0.7667	0.544	0.8729	-0.9974	0.3994	0.0478
	-8.33	82.306	77.4054	77.676	76.1948	75.4301	77.2301	68.7482	63.8968	45.3198	1.3613	0.3416			-8.33	-8.33	1.0078	0.9804	1.0878	1.0489	1.2113	1.0146	0.9593	0.995	0.9892	0.9996			-8.33	-8.33	-0.5654	0.3465	-1.528	-0.9027	-3.8478	-3.9421	-1.4408	-0.0061	1.0656	0.045
	-8	63.5701	63.4481	60.8495	58.7979	58.6938	60.4628	54.076	48.5604	29.3696	0.8229	0.2727			-8	-8	1.1013	1.0188	1.027	1.0303	1.098	1.0175	0.9528	0.9506	0.9886	0.9996			-8	-8	-4.0389	-0.7568	-1.1471	-1.2151	-3.8908	-4.1894	0.2134	6.0351	1.1267	0.0392
	-7.67	50.4195	47.0423	47.4485	47.7644	47.4354	48.3877	40.7821	37.8614	21.089	0.5621	0.2753			-7.67	-7.67	0.9953	0.997	1.0371	1.0353	1.068	0.9747	0.9619	0.9286	0.9899	1.0002			-7.67	-7.67	0.0599	0.16	-2.0574	-1.8759	-3.5545	2.9876	3.0899	7.034	1.0032	-0.0239
	-7.33	42.8489	42.8679	42.569	41.646	42.5855	41.6205	34.346	31.1726	15.6643	0.3978	0.2568			-7.33	-7.33	1.0498	1.0408	1.048	1.0711	1.0613	0.9797	0.9614	0.9087	0.9906	1.0004			-7.33	-7.33	-2.871	-2.1175	-2.8144	-3.8736	-3.5271	2.8413	3.5884	8.1723	0.9317	-0.0428
	OSM Dose														OSM Dose														OSM Dose

## Sheet: Fig2IJK - 3D Data
3D Data
	Heat map																Bliss Index														Excess over Bliss
Trial 1			-8	-7.67	-7.33	-7	-6.67	-6.33	-6	-5.67	-5.33	-5	BAY Dose				-8	-7.67	-7.33	-7	-6.67	-6.33	-6	-5.67	-5.33	-5	BAY Dose				-8	-7.67	-7.33	-7	-6.67	-6.33	-6	-5.67	-5.33	-5	BAY Dose
			96.165	97.19	91.002	84.521	80.339	81.44	55.765	48.456	2.307	0.214
	-11	99.464	97.394	95.445	87.15	90.821	82.913	81.91	64.809	55.123	53.278	1.367			-11		1.669	0.731	0.738	1.736	1.176	1.05	1.265	1.154	2.091	1.012			-11		-1.744	1.224	3.364	-6.753	-3.005	-0.906	-9.343	-6.927	-50.983	-1.154
	-10.67	99.013	96.071	98.23	87.236	85.62	83.237	60.303	48.021	45.54	2.009	0.077			-10.67		1.217	2.13	0.775	1.134	1.22	0.488	96	0.955	0.997	0.999			-10.67		-0.854	-1.999	2.867	-1.933	-3.691	20.334	7.194	2.438	0.276	0.135
	-10.33	97.375	87.254	95.594	85.404	89.295	82.681	63.375	44.989	40.407	1.439	0.074			-10.33		0.499	1.217	0.78	1.653	1.257	0.565	0.831	0.886	0.992	0.999			-10.33		6.387	-0.954	3.209	-6.992	-4.451	15.928	9.313	6.776	0.808	0.134
	-10	91.632	87.977	87.827	82.843	91.975	82.456	60.759	47.423	42.537	1.799	0.091			-10		0.988	0.899	0.968	2.81	1.504	0.647	0.93	0.968	0.997	0.999			-10		0.142	1.231	0.544	-14.526	-8.84	13.866	3.676	1.864	0.315	0.105
	-9.67	92.399	82.993	85.604	82.245	79.131	75.45	49.817	52.429	37.881	1.111	0.085			-9.67		0.655	0.708	0.896	1.05	1.05	0.493	1.019	0.889	0.99	0.999			-9.67		5.864	4.199	1.84	-1.035	-1.217	25.433	-0.902	6.892	1.021	0.112
	-9.33	90.827	89.698	88.222	79.748	76.955	67.939	51.744	41.009	34.885	1.839	0.101			-9.33		1.229	0.996	0.856	1.008	0.843	0.539	0.837	0.86	0.997	0.999			-9.33		-2.354	0.052	2.906	-0.188	5.03	22.226	9.641	9.126	0.257	0.093
	-9	65.788	63.505	66.343	51.893	62.369	50.684	43.499	37.717	30.017	0.393	0.076			-9		1.007	1.071	0.834	1.18	0.956	0.822	1.017	0.973	0.989	0.999			-9		-0.24	-2.404	7.974	-6.765	2.169	10.078	-1.031	1.861	1.125	0.064
	-8.67	62.245	49.856	57.297	52.192	49.061	44.835	51.125	38.029	30.804	0.841	0.079			-8.67		0.801	0.925	0.907	0.93	0.906	1.009	1.054	1.009	0.994	0.999			-8.67		10.002	3.199	4.452	3.549	5.172	-0.433	-3.318	-0.643	0.596	0.055
	-8.33	33.77	27.978	26.638	30.808	22.664	23.013	31.167	23.044	21.109	0.441	0.065			-8.33		0.938	0.916	1.001	0.924	0.947	1.053	1.055	1.06	0.997	1			-8.33		4.497	6.183	-0.077	5.878	4.118	-3.665	-4.212	-4.746	0.339	0.007
	-8	4.716	4.826	4.711	4.627	5.562	3.771	5.057	4.837	2.25	0.175	0.07			-8		1.003	1.001	1.004	1.017	1	1.013	1.023	1	1.001	1.001			-8		-0.291	-0.128	-0.335	-1.576	0.018	-1.216	-2.207	0.035	-0.066	-0.06
	OSM Dose														OSM Dose														OSM Dose
Trial 2			-8	-7.67	-7.33	-7	-6.67	-6.33	-6	-5.67	-5.33	-5	BAY Dose				-8	-7.67	-7.33	-7	-6.67	-6.33	-6	-5.67	-5.33	-5	BAY Dose				-8	-7.67	-7.33	-7	-6.67	-6.33	-6	-5.67	-5.33	-5	BAY Dose
			99.002	80.917	92.557	78.191	77.772	66.598	66.678	44.677	3.345	0.171
	-11	84.384	98.002	77.767	78.157	72.195	72.116	56.386	46.211	34.975	0.708	0.055			-11		8.236	1.427	1.002	1.223	1.233	1.004	0.813	0.958	0.979	0.999			-11		-14.459	-9.486	-0.053	-6.214	-6.489	-0.188	10.055	2.725	2.115	0.089
	-10.67	94.042	95.89	73.904	84.051	69.99	70.619	57.306	48.426	37.978	2.433	0.073			-10.67		1.678	0.916	0.812	0.882	0.914	0.875	0.723	0.935	0.993	0.999			-10.67		-2.786	2.192	2.991	3.542	2.519	5.323	14.28	4.036	0.713	0.088
	-10.33	84.511	98.454	75.637	76.73	75.602	69.736	56.894	44.499	35.291	1.671	0.067			-10.33		10.566	1.298	0.936	1.39	1.132	1.014	0.786	0.962	0.988	0.999			-10.33		-14.786	-7.253	1.492	-9.522	-4.01	-0.611	11.852	2.466	1.156	0.077
	-10	92.179	91.345	75.547	80.935	77.388	65.685	58.523	47.579	35.604	2.148	0.108			-10		1.01	1.039	0.77	1.235	0.825	0.931	0.735	0.913	0.99	1			-10		-0.085	-0.959	4.384	-5.313	6.005	2.866	13.885	5.578	0.935	0.049
	-9.67	98.992	97.485	71.771	76.121	70.626	60.437	58.71	45.697	31.369	1.2	0.067			-9.67		0.793	0.705	0.351	0.769	0.582	0.825	0.626	0.813	0.979	0.999			-9.67		0.519	8.33	15.503	6.777	16.55	7.216	20.309	12.857	2.111	0.102
	-9.33	94.469	99.975	70.357	83.342	67.808	64.022	53.308	48.299	36.247	1.89	0.062			-9.33		254.506	0.795	0.754	0.812	0.737	0.794	0.716	0.907	0.987	0.999			-9.33		-6.448	6.084	4.096	6.058	9.448	9.606	14.691	5.958	1.27	0.1
	-9	79.16	81.941	67.14	64.557	62.816	62.251	53.691	40.021	28.895	1.525	0.063			-9		1.198	1.094	0.754	1.025	1.018	1.021	0.787	0.909	0.989	0.999			-9		-3.57	-3.086	8.712	-0.92	-0.686	-0.973	12.761	6.471	1.122	0.073
	-8.67	56.701	72.384	47.382	57.038	49.912	42.17	45.344	38.842	25.661	1.112	0.078			-8.67		1.588	1.029	1.106	1.111	0.967	1.139	1.017	1.004	0.992	1			-8.67		-16.249	-1.501	-4.557	-5.577	1.927	-7.583	-1.035	-0.329	0.785	0.019
	-8.33	29.381	30.956	27.861	29.965	25.232	26.43	25.13	24.923	19.307	0.446	0.057			-8.33		1.027	1.057	1.04	1.03	1.049	1.074	1.071	1.077	0.995	1			-8.33		-1.868	-4.087	-2.77	-2.258	-3.58	-5.563	-5.332	-6.181	0.537	-0.007
	-8	11.942	15.29	10.495	11.955	12.484	14.254	11.939	11.112	3.684	0.324	0.052			-8		1.041	1.009	1.01	1.036	1.058	1.045	1.035	0.983	0.999	1			-8		-3.466	-0.832	-0.902	-3.146	-4.966	-3.986	-3.149	1.651	0.076	-0.032
	OSM Dose														OSM Dose														OSM Dose
Trial 3			-8	-7.67	-7.33	-7	-6.67	-6.33	-6	-5.67	-5.33	-5	BAY Dose				-8	-7.67	-7.33	-7	-6.67	-6.33	-6	-5.67	-5.33	-5	BAY Dose				-8	-7.67	-7.33	-7	-6.67	-6.33	-6	-5.67	-5.33	-5	BAY Dose
			96.335	96.688	85.297	87.494	71.479	71.845	60.253	46.362	9.419	0.109
	-11	98.615	96.776	99.998	83.373	66.208	55.705	55.635	39.424	40.773	2.204	0.074			-11		1.551	2204.37	0.955	0.406	0.666	0.657	0.67	0.916	0.928	1			-11		-1.775	-4.649	0.743	20.075	14.784	15.216	19.995	4.947	7.085	0.034
	-10.67	96.179	93.315	80.155	77.911	69.677	61.029	50.893	47.097	35.574	2.621	0.093			-10.67		1.099	0.353	0.813	0.523	0.802	0.629	0.795	0.86	0.934	1			-10.67		-0.661	12.838	4.127	14.474	7.718	18.207	10.854	9.016	6.438	0.012
	-10.33	95.028	99.897	98.812	86.024	65.715	65.404	59.318	46.496	37.436	2.617	0.091			-10.33		82.456	6.835	1.355	0.492	0.927	0.78	0.799	0.894	0.935	1			-10.33		-8.353	-6.932	-4.968	17.429	2.521	8.955	10.761	6.621	6.333	0.013
	-10	98.998	90.712	94.785	92.628	65.362	61.572	62.159	51.507	40.202	1.596	0.167			-10		0.499	0.821	2.11	0.386	0.761	0.763	0.832	0.905	0.921	1.001			-10		4.657	0.934	-8.186	21.255	9.19	8.966	8.143	5.695	7.728	-0.058
	-9.67	91.781	88.996	85.239	81.716	63.157	61.921	59.16	47.634	38.223	3.122	0.084			-9.67		1.053	0.763	1.188	0.535	0.903	0.834	0.854	0.93	0.943	1			-9.67		-0.579	3.502	-3.429	17.146	3.683	6.781	7.668	4.329	5.523	0.017
	-9.33	92.665	83.449	91.817	74.325	61.181	52.83	55.57	40.951	34.895	2.077	0.071			-9.33		0.648	1.272	0.816	0.487	0.716	0.752	0.748	0.876	0.932	1			-9.33		5.819	-2.222	4.715	19.895	13.405	11.005	14.882	8.066	6.651	0.03
	-9	83.743	76.847	69.014	71.926	57.321	57.148	57.82	41.32	34.863	2.566	0.059			-9		0.835	0.614	1.018	0.626	0.937	0.944	0.844	0.939	0.945	1			-9		3.827	11.955	-0.496	15.95	2.71	2.345	9.138	3.962	5.322	0.033
	-8.67	57.971	59.747	53.451	51.042	38.326	36.115	41.494	35.386	29.318	1.393	0.092			-8.67		1.097	0.944	1.033	0.799	0.917	0.997	1.007	1.035	0.959	1			-8.67		-3.901	2.6	-1.594	12.395	5.322	0.156	-0.456	-2.442	4.068	-0.028
	-8.33	34.144	29.671	28.773	27.531	24.681	22.421	27.428	24.397	13.612	0.58	0.083			-8.33		0.954	0.94	0.978	0.931	0.974	1.04	1.051	0.974	0.973	1			-8.33		3.221	4.24	1.592	5.193	1.985	-2.897	-3.824	2.218	2.636	-0.045
	-8	12.174	11.285	9.349	11.252	8.213	8.977	18.304	9.987	2.421	0.161	0.033			-8		0.995	0.973	1.01	0.973	1.003	1.117	1.029	0.967	0.99	1			-8		0.443	2.422	-0.867	2.439	-0.275	-9.557	-2.651	3.223	0.986	-0.02
	OSM Dose														OSM Dose														OSM Dose
Average			-8	-7.67	-7.33	-7	-6.67	-6.33	-6	-5.67	-5.33	-5	BAY Dose				-8	-7.67	-7.33	-7	-6.67	-6.33	-6	-5.67	-5.33	-5	BAY Dose				-8	-7.67	-7.33	-7	-6.67	-6.33	-6	-5.67	-5.33	-5	BAY Dose
			97.168	91.598	89.619	83.402	76.53	73.294	60.899	46.498	5.024	0.165
	-11	94.154	97.391	91.07	82.893	76.408	70.245	64.643	50.148	43.624	18.73	0.499			-11		3.819	735.51	0.899	1.122	1.025	0.904	0.916	1.01	1.332	1.003			-11		-5.993	-4.304	1.351	2.369	1.763	4.707	6.902	0.248	-13.928	-0.344
	-10.67	96.412	95.092	89.193	83.066	75.096	71.629	56.168	47.848	39.697	2.354	0.081			-10.67		1.331	1.133	0.8	0.846	0.979	0.664	32.506	0.917	0.975	0.999			-10.67		-1.434	4.344	3.328	5.361	2.182	14.621	10.776	5.164	2.476	0.078
	-10.33	92.305	95.202	90.014	82.719	76.871	72.607	59.862	45.328	37.711	1.909	0.077			-10.33		31.174	3.116	1.024	1.178	1.106	0.786	0.805	0.914	0.972	0.999			-10.33		-5.584	-5.047	-0.089	0.305	-1.98	8.091	10.642	5.288	2.765	0.075
	-10	94.27	90.011	86.053	85.469	78.242	69.904	60.481	48.836	39.448	1.848	0.122			-10		0.832	0.92	1.283	1.477	1.03	0.78	0.832	0.929	0.97	1			-10		1.571	0.402	-1.086	0.472	2.118	8.566	8.568	4.379	2.993	0.032
	-9.67	94.391	89.825	80.871	80.027	70.971	65.936	55.896	48.587	35.824	1.811	0.079			-9.67		0.834	0.725	0.812	0.784	0.845	0.717	0.833	0.877	0.97	0.999			-9.67		1.935	5.344	4.638	7.629	6.339	13.143	9.025	8.026	2.885	0.077
	-9.33	92.653	91.041	83.466	79.138	68.648	61.597	53.54	43.42	35.342	1.935	0.078			-9.33		85.461	1.021	0.809	0.769	0.765	0.695	0.767	0.881	0.972	0.999			-9.33		-0.995	1.305	3.906	8.589	9.294	14.279	13.072	7.717	2.726	0.074
	-9	76.23	74.097	67.499	62.792	60.835	56.694	51.67	39.686	31.258	1.495	0.066			-9		1.013	0.927	0.869	0.944	0.97	0.929	0.883	0.941	0.974	0.999			-9		0.006	2.155	5.397	2.755	1.398	3.817	6.956	4.098	2.523	0.057
	-8.67	58.972	60.663	52.71	53.424	45.766	41.04	45.988	37.419	28.595	1.115	0.083			-8.67		1.162	0.966	1.015	0.947	0.93	1.048	1.026	1.016	0.982	1			-8.67		-3.383	1.433	-0.566	3.456	4.14	-2.62	-1.603	-1.138	1.816	0.015
	-8.33	32.432	29.535	27.758	29.435	24.192	23.954	27.908	24.121	18.01	0.489	0.068			-8.33		0.973	0.971	1.006	0.962	0.99	1.056	1.059	1.037	0.988	1			-8.33		1.95	2.112	-0.418	2.938	0.841	-4.042	-4.456	-2.903	1.17	-0.015
	-8	9.611	10.467	8.185	9.278	8.753	9.001	11.767	8.645	2.785	0.22	0.052			-8		1.013	0.995	1.008	1.009	1.02	1.058	1.029	0.983	0.997	1			-8		-1.105	0.487	-0.701	-0.761	-1.741	-4.92	-2.669	1.637	0.332	-0.037
	OSM Dose														OSM Dose														OSM Dose
