# Supplementary material for: Marked synergy by vertical inhibition of EGFR signaling in NSCLC spheroids shows SOS1 is a therapeutic target in EGFR-mutated cancer
Source: eLife. 2020 Sep 8;9:e58204. doi: 10.7554/eLife.58204 (PMC7478890; doi:10.7554/eLife.58204)
Supplement: Figure 3—source data 1. [file elife-58204-fig3-data1.xlsx]

## Sheet: HCC827
	HCC827
Osimertinib vs BAY-293	Osimertinib	100	80	66	50	34	20	0
	BAY-293	0	20	34	50	66	80	100
Osimertinib IC50	Trial 1	2.759	1.084	1.11085	0.7015	0.7497	0.571	0
	Trial 2	1.729	0.73056	0.79755	0.8165	0.50155	0.6	0
	Trial 3	2.013	1.2608	1.41895	1.049	0.99365	0.8406	0
	Average	2.167	1.02512	1.10912	0.855667	0.7483	0.670533	0
	SD	0.531989	0.269979	0.310704	0.17703	0.246053	0.147994	0
BAY-293 IC50	Trial 1	0	0.05874	0.12922	0.15115	0.30303	0.49616	1.519
	Trial 2	0	0.0394	0.093135	0.1774	0.19955	0.52464	1.782
	Trial 3	0	0.01457	0.03528	0.048595	0.08554	0.13624	0.8517
	Average	0	0.03757	0.0858783	0.125715	0.19604	0.38568	1.38423
	SD	0	0.0221418	0.0473886	0.0680653	0.108787	0.21649	0.479569
Combination Index	Osimertinib		80	66	50	34	20
	BAY-293		20	34	50	66	80
	Trial 1		0.431566	0.487697	0.353765	0.471222	0.533595
	Trial 2		0.444643	0.513543	0.571789	0.402062	0.641432
	Trial 3		0.643436	0.746316	0.578169	0.594051	0.577548
	Average		0.506548	0.582519	0.501241	0.489112	0.584192
	SD		0.118728	0.14244	0.127758	0.0972367	0.0542247
	T-Statistic		-7.19866	-5.0765	-6.76182	-9.10032	-13.2818
	Significant?		yes	yes	yes	yes	yes
Gefitinib vs BAY-293	Gefitinib	100	80	66	50	34	20	0
	BAY-293	0	20	34	50	66	80	100
Gefitinib IC50	Trial 1	2.021	1.0408	1.10175	0.8425	1.22045	1.0306	0
	Trial 2	1.526	0.92	0.99905	0.9515	0.99575	0.8152	0
	Trial 3	2.119	0.7784	0.93405	0.839	0.637	0.378	0
	Average	1.88867	0.913067	1.01162	0.877667	0.951067	0.741267	0
	SD	0.317878	0.131337	0.0845533	0.0639655	0.29428	0.332523	0
BAY-293 IC50	Trial 1	0	0.02602	0.059325	0.08425	0.226655	0.34248	1.519
	Trial 2	0	0.023	0.053795	0.09515	0.160225	0.25016	1.782
	Trial 3	0	0.01946	0.050295	0.0839	0.109265	0.15168	0.8517
	Average	0	0.0228267	0.0544717	0.0877667	0.165382	0.248107	1.38423
	SD	0	0.00328343	0.00455287	0.00639655	0.0588646	0.0954166	0.479569
Combination Index	Gefitinib		80	66	50	34	20
	BAY-293		20	34	50	66	80
	Trial 1		0.532122	0.584206	0.472337	0.753098	0.73541
	Trial 2		0.61579	0.684873	0.676921	0.742436	0.674589
	Trial 3		0.484119	0.621878	0.617454	0.538052	0.451282
	Average		0.544011	0.630319	0.588904	0.677862	0.620427
	SD		0.0666357	0.0508617	0.105238	0.121196	0.149607
	T-Statistic		-11.8525	-12.5892	-6.76602	-4.60378	-4.39444
	Significant?		yes	yes	yes	yes	yes
Osimertinib vs Gefitinib	Osimertinib	100	80	66	50	34	20	0
	Gefitinib	0	20	34	50	66	80	100
Osimertinib IC50	Trial 1	2.759	1.8352	1.72575	1.1035	0.6811	0.4054	0
	Trial 2	1.729	2.3856	1.6497	1.21	0.58345	0.344	0
	Trial 3	2.004	1.5416	1.5132	1.0065	0.9653	0.9254	0
	Average	2.164	1.9208	1.62955	1.10667	0.743283	0.558267	0
	SD	0.533315	0.428462	0.107698	0.101787	0.198374	0.319426	0
Gefitinib IC50	Trial 1	0	0.4588	0.92925	1.1035	1.2649	1.6216	2.021
	Trial 2	0	0.5964	0.8883	1.148	1.08355	1.4064	1.526
	Trial 3	0	0.17806	0.37695	0.692	0.8281	1.6952	2.119
	Average	0	0.411087	0.7315	0.981167	1.05885	1.5744	1.88867
	SD	0	0.213212	0.307731	0.251412	0.219445	0.150074	0.317878
Combination Index	Osimertinib		80	66	50	34	20
	Gefitinib		20	34	50	66	80
	Trial 1		0.892185	1.0853	0.945981	0.872743	0.949312
	Trial 2		1.77058	1.53625	1.45212	1.04751	1.12058
	Trial 3		0.853292	0.93298	0.828815	0.872484	1.26178
	Average		1.17202	1.18484	1.07564	0.930912	1.11056
	SD		0.518735	0.31371	0.331264	0.100976	0.156473
	T-Statistic		0.574372	1.02054	0.395484	-1.18508	1.2238
	Significant?		no	no	no	no	no
*** For significance on a 1-tailed T Test with an alpha=0.05 , a T-value < -2.919986 indicates significance with a sample size of 3

## Sheet: H1975
	H1975
Osimertinib vs BAY-293	Osimertinib	100	80	66	50	34	20	0
	BAY-293	0	20	34	50	66	80	100
Osimertinib IC50	Trial 1	2.622	0.6716	0.453375	0.46055	0.5201	0.2374	0
	Trial 2	2.86	0.840075	0.66525	0.52942	0.50152	0.546075	0
	Trial 3	2.612	0.888975	0.57633	0.48923	0.66695	0.623175	0
	Average	2.698	0.800217	0.564985	0.493067	0.562857	0.468883	0
	SD	0.140385	0.114037	0.106392	0.0345949	0.0906249	0.204143	0
BAY-293 IC50	Trial 1	0	0.04845	0.077695	0.12544	0.27408	0.60091	1.491
	Trial 2	0	0.05268	0.06254	0.13043	0.42373	0.681747	1.904
	Trial 3	0	0.10131	0.143917	0.266123	0.55457	0.705953	1.737
	Average	0	0.06748	0.0947172	0.173998	0.41746	0.66287	1.71067
	SD	0	0.0293739	0.0432765	0.0798221	0.14035	0.0550068	0.207755
Combination Index	Osimertinib		80	66	50	34	20
	BAY-293		20	34	50	66	80
	Trial 1		0.404643	0.336787	0.443504	0.646222	0.457238
	Trial 2		0.368011	0.253494	0.255804	0.477888	0.596642
	Trial 3		0.366294	0.291665	0.322851	0.49443	0.54928
	Average		0.379649	0.293982	0.34072	0.539513	0.534387
	SD		0.0216622	0.041695	0.0951175	0.092782	0.0708855
	T-Statistic		-49.6015	-29.3286	-12.0052	-8.59634	-11.377
	Significant?		yes	yes	yes	yes	yes
*** For significance on a 1-tailed T Test with an alpha=0.05 , a T-value < -2.919986 indicates significance with a sample size of 3

## Sheet: PC9
	PC9
Osimertinib vs BAY-293	Osimertinib	100	66	50	34	0
	BAY-293	0	34	50	66	100
Osimertinib IC50	Trial 1	71.24	42.12	28.405	14.525	0
	Trial 2	53.84	26.195	21.395	11.445	0
	Trial 3	33.71	14.1375	13.83	9.254	0
	Trial 4	51	24.1995	22.08	20.041	0
	Average	52.4475	26.663	21.4275	13.8163	0
	SD	15.3654	11.5772	5.96753	4.67927	0
BAY-293 IC50	Trial 1	0	0.2268	0.28405	0.262275	1.904
	Trial 2	0	0.11802	0.16325	0.21255	1.435
	Trial 3	0	0.16415	0.2984	0.371475	1.44
	Trial 4	0	0.130305	0.2208	0.37219	2.2
	Average	0	0.159819	0.241625	0.304622	1.74475
	SD	0	0.0487287	0.0621815	0.080219	0.374803
Combination Index	Osimertinib		66	50	34
	BAY-293		34	50	66
	Trial 1		0.710359	0.547909	0.341638
	Trial 2		0.567871	0.50989	0.359059
	Trial 3		0.533379	0.617486	0.532487
	Trial 4		0.541666	0.547235	0.588393
	Average		0.588319	0.55563	0.455394
	SD		0.0826774	0.0449016	0.123629
	T-Statistic		-8.62452	-17.1413	-7.62994
	Significant?		yes	yes	yes
Gefitinib vs BAY-293	Gefitinib	100	66	50	34	0
	BAY-293	0	34	50	66	100
Gefitinib IC50	Trial 1	33.31	24.1085	19.665	19.747	0
	Trial 2	37.65	25.441	13.005	8.687	0
	Trial 3	25.25	17.526	11.255	7.757	0
	Trial 4	22.02	10.66	8.375	9.884	0
	Average	29.5575	19.4339	13.075	11.5188	0
	SD	7.18652	6.79604	4.79011	5.55416	0
BAY-293 IC50	Trial 1	0	0.129815	0.19665	0.36673	1.904
	Trial 2	0	0.13699	0.13005	0.16133	1.451
	Trial 3	0	0.127	0.24295	0.374	1.44
	Trial 4	0	0.268975	0.3927	0.9386	2.2
	Average	0	0.165695	0.240588	0.460165	1.74875
	SD	0	0.0689817	0.111494	0.333845	0.370455
Combination Index	Gefitinib		66	50	34
	BAY-293		34	50	66
	Trial 1		0.791942	0.693646	0.785435
	Trial 2		0.770135	0.435046	0.341916
	Trial 3		0.782293	0.614458	0.56693
	Trial 4		0.606367	0.558836	0.875501
	Average		0.737684	0.575496	0.642446
	SD		0.0879984	0.108752	0.238594
	T-Statistic		-5.1631	-6.76089	-2.59563
	Significant?		yes	yes	yes
Osimertinib vs Gefitinib	Osimertinib	100	66	50	34	0
	Gefitinib	0	34	50	66	100
Osimertinib IC50	Trial 1	71.24	32.175	22.235	14.805	0
	Trial 2	53.84	36.491	18.02	12.9885	0
	Trial 3	33.71	21.9765	11.56	8.582	0
	Trial 4	51	26.455	16.8	10.045	0
	Average	52.4475	29.2744	17.1537	11.6051	0
	SD	15.3654	6.36923	4.39639	2.81225	0
Gefitinib IC50	Trial 1	0	17.325	22.235	27.495	33.31
	Trial 2	0	19.649	18.02	24.1215	37.65
	Trial 3	0	11.8335	11.56	15.938	25.25
	Trial 4	0	14.245	16.8	18.655	22.02
	Average	0	15.7631	17.1537	21.5524	29.5575
	SD	0	3.42958	4.39639	5.22274	7.18652
Combination Index	Osimertinib		66	50	34
	Gefitinib		34	50	66
	Trial 1		0.971756	0.979631	1.03325
	Trial 2		1.19965	0.813314	0.88192
	Trial 3		1.12058	0.800747	0.885791
	Trial 4		1.16564	1.09235	1.04415
	Average		1.11441	0.921512	0.961276
	SD		0.100464	0.140067	0.0895217
	T-Statistic		1.97245	-0.970579	-0.749232
	Significant?		no	no	no
*** For significance on a 1-tailed T Test with an alpha=0.05 , a T-value < -2.919986 indicates significance with a sample size of 3

## Sheet: PC9TM
	PC9-TM
Osimertinib vs BAY-293	Osimertinib	100	66	50	34	0
	BAY-293	0	34	50	66	100
Osimertinib IC50	Trial 1	60.54	42.861	18.74	31.479	0
	Trial 2	69.58	31.408	37.385	21.553	0
	Trial 3	50.53	23.2245	34.86	22.722	0
	Average	60.2167	32.4978	30.3283	25.2513	0
	SD	9.52912	9.86351	10.1149	5.4249	0
BAY-293 IC50	Trial 1	0	0.23079	0.1874	0.58461	3.157
	Trial 2	0	0.16912	0.37385	0.40027	3.241
	Trial 3	0	0.125055	0.3486	0.42198	4.53
	Average	0	0.174988	0.303283	0.468953	3.64267
	SD	0	0.0531112	0.101149	0.100748	0.7696
Combination Index	Osimertinib		66	50	34
	BAY-293		34	50	66
	Trial 1		0.781082	0.368908	0.705149
	Trial 2		0.503576	0.652645	0.433261
	Trial 3		0.487224	0.766841	0.542826
	Average		0.590627	0.596131	0.560412
	SD		0.165141	0.204898	0.136795
	T-Statistic		-4.29362	-3.414	-5.56592
	Significant?		yes	yes	yes
*** For significance on a 1-tailed T Test with an alpha=0.05 , a T-value < -2.919986 indicates significance with a sample size of 3

## Sheet: H3255
	H3255
Osimertinib vs BAY-293	Osimertinib	100	66	50	34	0
	BAY-293	0	34	50	66	100
Osimertinib IC50	Trial 1	9.972	3.1421	2.19	1.3748	0
	Trial 2	7.056	1.93505	1.571	1.40595	0
	Trial 3	9.671	3.1447	1.652	0.93415	0
	Average	8.89967	2.74062	1.80433	1.2383	0
	SD	1.60374	0.697642	0.336444	0.263862	0
BAY-293 IC50	Trial 1	0	1.6919	2.6295	2.5532	5.355
	Trial 2	0	1.04195	1.571	2.61105	7.866
	Trial 3	0	3.5945	3.5475	3.705	7.721
	Average	0	2.10945	2.58267	2.95642	6.98067
	SD	0	1.32651	0.989082	0.648937	1.40973
Combination Index	Osimertinib		66	50	34
	BAY-293		34	50	66
	Trial 1		0.63104	0.710651	0.614654
	Trial 2		0.406704	0.422368	0.531197
	Trial 3		0.790717	0.630281	0.576453
	Average		0.609487	0.587767	0.574101
	SD		0.192911	0.14877	0.0417781
	T-Statistic		-3.50622	-4.79942	-17.6571
	Significant?		yes	yes	yes
Gefitinib vs BAY-293	Gefitinib	100	66	50	34	0
	BAY-293	0	34	50	66	100
Gefitinib IC50	Trial 1	2.398	0.8892	0.591	0.36505	0
	Trial 2	3.439	1.0647	0.6105	0.50645	0
	Trial 3	2.435	0.7137	0.8335	0.55965	0
	Average	2.75733	0.8892	0.678333	0.47705	0
	SD	0.59063	0.1755	0.134732	0.100576	0
BAY-293 IC50	Trial 1	0	2.25015	2.772	3.17005	5.355
	Trial 2	0	2.70935	2.868	4.43495	7.866
	Trial 3	0	0.83265	1.8225	2.2516	7.721
	Average	0	1.93072	2.4875	3.28553	6.98067
	SD	0	0.978279	0.577904	1.09625	1.40973
Combination Index	Gefitinib		66	50	34
	BAY-293		34	50	66
	Trial 1		0.791005	0.764102	0.74421
	Trial 2		0.654034	0.54213	0.711079
	Trial 3		0.400943	0.578344	0.521456
	Average		0.615327	0.628192	0.658915
	SD		0.197891	0.119086	0.12019
	T-Statistic		-3.36687	-5.40775	-4.91534
	Significant?		yes	yes	yes
Osimertinib vs Gefitinib	Osimertinib	100	66	50	34	0
	Gefitinib	0	34	50	66	100
Osimertinib IC50	Trial 1	9.972	7.67	6.495	4.9455	0
	Trial 2	7.056	5.8409	6.1	4.0495	0
	Trial 3	9.671	7.17691	6.7065	4.6389	0
	Average	8.89967	6.89594	6.43383	4.54463	0
	SD	1.60374	0.946367	0.307842	0.455377	0
Gefitinib IC50	Trial 1	0	0.86975	1.358	1.9162	2.149
	Trial 2	0	0.66255	1.2805	1.5782	3.439
	Trial 3	0	0.814097	1.40782	1.80791	2.435
	Average	0	0.782132	1.34877	1.76744	2.67433
	SD	0	0.107235	0.0641574	0.172596	0.677485
Combination Index	Osimertinib		66	50	34
	Gefitinib		34	50	66
	Trial 1		1.17388	1.28325	1.38761
	Trial 2		1.02045	1.23686	1.03282
	Trial 3		1.07644	1.27162	1.22214
	Average		1.09025	1.26391	1.21419
	SD		0.0776411	0.0241362	0.177527
	T-Statistic		2.01344	18.9386	2.08974
	Significant?		no	no	no
*** For significance on a 1-tailed T Test with an alpha=0.05 , a T-value < -2.919986 indicates significance with a sample size of 3
