# Supplementary material for: Marked synergy by vertical inhibition of EGFR signaling in NSCLC spheroids shows SOS1 is a therapeutic target in EGFR-mutated cancer
Source: eLife. 2020 Sep 8;9:e58204. doi: 10.7554/eLife.58204 (PMC7478890; doi:10.7554/eLife.58204)
Supplement: Figure 4—source data 1. [file elife-58204-fig4-data1.xlsx]

## Sheet: HCC827
OSM: BAY 1:2 ratio
	-11.67	-11.33	-11	-10.67	-10.33	-10	-9.67	-9.33	-9	-8.67
	-8.33	-8	-7.67	-7.33	-7	-6.67	-6.33	-6	-5.67	-5.33	Log [Osimertinib]
Trial 1	0.947	1.387	1.29	1.388	2.14	1.745	0.886	0.872	0.707	0.901	Log [BAY-293]
Trial 2	1.465	0.912	1.442	2.188	0.771	2.562	0.454	0.814	0.737	0.903
Trial 3	1.156	0.951	1.754	2.153	1.578	1.845	0.841	0.69	0.734	0.951
Mean	1.189	1.083	1.495	1.91	1.496	2.051	0.727	0.792	0.726	0.918
SD	0.261	0.264	0.237	0.452	0.688	0.446	0.237	0.093	0.016	0.028
OSM:BAY 1:1 ratio
	-11.33	-11	-10.67	-10.33	-10	-9.67	-9.33	-9	-8.67	-8.33
	-8.33	-8	-7.67	-7.33	-7	-6.67	-6.33	-6	-5.67	-5.33	Log [Osimertinib]
Trial 1	0.88	0.712	0.993	1.002	0.912	1.655	0.654	0.762	1.052	0.901	Log [BAY-293]
Trial 2	0.872	1.009	1.141	0.955	1.311	1.719	0.261	0.421	1.046	0.875
Trial 3	1.354	1.354		1.165	1.149	1.255	0.542	0.712	1.154	0.944
Mean	1.035	1.025	1.067	1.041	1.124	1.543	0.486	0.632	1.084	0.907
SD	0.276	0.321	0.104	0.11	0.201	0.251	0.203	0.184	0.06	0.035
OSM:BAY 2:1 ratio
	-11	-10.67	-10.33	-10	-9.67	-9.33	-9	-8.67	-8.33	-8
	-8.33	-8	-7.67	-7.33	-7	-6.67	-6.33	-6	-5.67	-5.33	Log [Osimertinib]
Trial 1	1.254	1.202	0.994	0.761	0.836	0.601	0.494	0.881	0.895	1.265	Log [BAY-293]
Trial 2	1.265	0.797	0.954	2.285	1.193	0.635	0.33	0.912	0.98	0.945
Trial 3	1.165	0.812	1.253	1.256	0.997	0.633	0.433	0.988	0.935	1.245
Mean	1.228	0.937	1.067	1.434	1.009	0.623	0.419	0.927	0.937	1.152
SD	0.055	0.23	0.162	0.777	0.179	0.019	0.083	0.055	0.043	0.179
GEF: BAY 1:2 ratio
	-11.67	-11.33	-11	-10.67	-10.33	-10	-9.67	-9.33	-9	-8.67
	-8	-7.67	-7.33	-7	-6.67	-6.33	-6	-5.67	-5.33	-5	Log [gefitninib]
Trial 1	1.346	1.084	1.019	2.813	0.765	0.723	0.707	0.959	1.058	0.977	Log [BAY-293]
Trial 2	1.354	3.478	1.366	1.109	0.601	0.851	0.446	0.991	1.258	0.961
Trial 3	1.495	1.997	1.297	1.077	0.742	0.902	0.451	0.888	1.298	0.939
Mean	1.399	2.186	1.227	1.666	0.703	0.825	0.535	0.946	1.205	0.959
SD	0.084	1.208	0.184	0.993	0.089	0.092	0.149	0.053	0.128	0.019
GEF:BAY 1:1 ratio
	-11.33	-11	-10.67	-10.33	-10	-9.67	-9.33	-9	-8.67	-8.33
	-8	-7.67	-7.33	-7	-6.67	-6.33	-6	-5.67	-5.33	-5	Log [gefitninib]
Trial 1	0.924	1.022	1.29	0.523	0.437	0.814	0.715	0.96	0.967	0.997	Log [BAY-293]
Trial 2	1.12	0.801	0.938	0.428	0.624	0.662	0.749	1.466	1.09	0.983
Trial 3		0.974	1.345	0.507	0.634	0.691	0.821	1.745	1.056	0.992
Mean	1.022	0.932	1.191	0.486	0.565	0.722	0.762	1.39	1.038	0.99
SD	0.139	0.116	0.221	0.051	0.111	0.081	0.054	0.398	0.064	0.007
GEF:BAY 2:1 ratio
	-11	-10.67	-10.33	-10	-9.67	-9.33	-9	-8.67	-8.33	-8
	-8	-7.67	-7.33	-7	-6.67	-6.33	-6	-5.67	-5.33	-5	Log [gefitninib]
Trial 1	0.954	0.999	0.545	0.635	0.786	0.876	1.203	1.082	1.022	0.965	Log [BAY-293]
Trial 2	1.654	1	0.685	0.902	0.524	0.749	1.101	1.073	1.032	0.985
Trial 3	1.125	0.987	0.588	0.618	0.719	0.762	1.254	1.099	1.152	0.977
Mean	1.244	0.995	0.606	0.718	0.676	0.796	1.186	1.085	1.069	0.975
SD	0.365	0.007	0.072	0.159	0.136	0.07	0.078	0.013	0.072	0.01
GEF:OSM 1:2 ratio
	-11.67	-11.33	-11	-10.67	-10.33	-10	-9.67	-9.33	-9	-8.67
	-10.67	-10.33	-10	-9.67	-9.33	-9	-8.67	-8.33	-8	-7.67	Log [gefitninib]
Trial 1	4.657	6.72	6.751	4.204	2.885	1.242	1.218	0.992	1.026	1.022	Log [Osimertinib]
Trial 2	5.355	2.095	2.311	2.314	2.07	1.752	0.864	0.727	0.954	1.024
Trial 3	3.564	4.545	5.558	2.011	1.972	1.364	1.119	0.987	0.957	1.066
Mean	4.525	4.453	4.873	2.843	2.309	1.453	1.067	0.902	0.979	1.037
SD	0.903	2.314	2.298	1.188	0.501	0.266	0.183	0.151	0.041	0.025
GEF:OSM 1:1 ratio
	-11.33	-11	-10.67	-10.33	-10	-9.67	-9.33	-9	-8.67	-8.33
	-10.67	-10.33	-10	-9.67	-9.33	-9	-8.67	-8.33	-8	-7.67	Log [gefitninib]
Trial 1	2.354	1.719	2.247	1.063	1.314	1.162	1.36	1.03	1.016	1.048	Log [Osimertinib]
Trial 2	3.813	1.031	2.368	9.411	3.769	2.641	1.592	1.117	1.029	1.027
Trial 3	5.654	1.016	1.087	1.165	1.423	1.745	2.154	1.945	1.456	1.065
Mean	3.94	1.255	1.901	3.88	2.169	1.849	1.702	1.364	1.167	1.046
SD	1.654	0.402	0.707	4.79	1.387	0.745	0.408	0.505	0.25	0.019
GEF:OSM 2:1 ratio
	-11	-10.67	-10.33	-10	-9.67	-9.33	-9	-8.67	-8.33	-8
	-10.67	-10.33	-10	-9.67	-9.33	-9	-8.67	-8.33	-8	-7.67	Log [gefitninib]
Trial 1	4.178	3.198	3.031	4.518	2.096	2.227	1.909	2.764	2.545	2.166	Log [Osimertinib]
Trial 2	4.263	1.093	2.009	2.3	1.684	2.406	1.525	1.046	1.031	1.035
Trial 3	6.456	1.058	2.566	1.914	2.156	1.498	1.954	1.421	1.166	2.174
Mean	4.965	1.783	2.535	2.911	1.979	2.044	1.796	1.744	1.581	1.791
SD	1.292	1.225	0.512	1.405	0.257	0.481	0.235	0.903	0.838	0.655

## Sheet: H1975
OSM: BAY 1:2 ratio
	-11.33	-11	-10.67	-10.33	-10	-9.67	-9.33	-9	-8.67	-8.33	Log [Osimertinib]
	-8	-7.67	-7.33	-7	-6.67	-6.33	-6	-5.67	-5.33	-5	Log [BAY-293]
Trial 1	3.456	0.731	0.775	1.653	1.504	0.493	0.837	0.973	0.994	1
Trial 2	4.546	1.427	0.812	1.39	0.825	0.825	0.716	0.909	0.992	1
Trial 3	2.265	2204.37	0.813	0.492	0.761	0.834	0.748	0.939	0.959	1
Mean	3.423	735.51	0.8	1.178	1.03	0.717	0.767	0.94	0.982	1
SD	1.141	1272.07	0.022	0.609	0.412	0.194	0.063	0.032	0.02	0
OSM:BAY 1:1 ratio
	-11	-10.67	-10.33	-10	-9.67	-9.33	-9	-8.67	-8.33	-8	Log [Osimertinib]
	-8	-7.67	-7.33	-7	-6.67	-6.33	-6	-5.67	-5.33	-5	Log [BAY-293]
Trial 1	1.669	2.13	0.78	2.81	1.05	0.539	1.017	1.009	0.997	1.001
Trial 2	8.236	0.916	0.936	1.235	0.582	0.794	0.787	1.004	0.995	1
Trial 3	1.551	0.353	1.355	0.386	0.903	0.752	0.844	1.035	0.973	1
Mean	3.819	1.133	1.024	1.477	0.845	0.695	0.883	1.016	0.988	1
SD	3.826	0.908	0.297	1.23	0.239	0.137	0.12	0.017	0.013	0.001
OSM:BAY 2:1 ratio
	-10.67	-10.33	-10	-9.67	-9.33	-9	-8.67	-8.33	-8	-7.67	Log [Osimertinib]
	-8	-7.67	-7.33	-7	-6.67	-6.33	-6	-5.67	-5.33	-5	Log [BAY-293]
Trial 1	1.217	1.217	0.968	1.05	0.843	0.822	1.054	1.06	1.001	1.001
Trial 2	1.678	1.298	0.77	0.769	0.737	1.021	1.017	1.077	0.999	1.001
Trial 3	1.099	6.835	2.11	0.535	0.716	0.944	1.007	0.974	0.99	1.001
Mean	1.331	3.117	1.283	0.785	0.765	0.929	1.026	1.037	0.997	1.001
SD	0.306	3.22	0.723	0.258	0.068	0.1	0.025	0.055	0.006	0

## Sheet: PC9
OSM: BAY 1:2 ratio
	-10.33	-10	-9.67	-9.33	-9	-8.67	-8.33	-8	-7.67	-7.33
	-8	-7.67	-7.33	-7	-6.67	-6.33	-6	-5.67	-5.33	-5	Log [Osimertinib]
Trial 1	0.886	5.486	1.756	2.791	5.982	1.687	0.863	0.986	0.848	1.001	Log [BAY-293]
Trial 2	5.747	1.936	4.766	6.507	1.987	1.601	0.824	0.839	0.905	1.001
Trial 3	0.846	1.723	1.862	1.037	1.748	0.732	0.671	0.979	0.937	1.001
Mean	2.493	3.048	2.795	3.445	3.239	1.34	0.786	0.935	0.897	1.001
SD	2.818	2.114	1.708	2.793	2.379	0.528	0.101	0.083	0.045	0
OSM:BAY 1:1 ratio
	-10	-9.67	-9.33	-9	-8.67	-8.33	-8	-7.67	-7.33	-7
	-8	-7.67	-7.33	-7	-6.67	-6.33	-6	-5.67	-5.33	-5	Log [Osimertinib]
Trial 1	10.333	2.021	4.036	1.287	3.912	0.842	0.721	0.898	0.943	1.001	Log [BAY-293]
Trial 2	1.356	1.204	3.073	2.186	3.21	0.743	0.889	0.825	0.962	1.001
Trial 3	2.455	5.02	6.21	10.194	13.127	0.677	0.856	0.954	0.98	1.001
Mean	4.715	2.748	4.44	4.555	6.75	0.754	0.822	0.892	0.962	1.001
SD	4.896	2.009	1.607	4.903	5.534	0.083	0.089	0.065	0.018	0
OSM:BAY 2:1 ratio
	-9.67	-9.33	-9	-8.67	-8.33	-8	-7.67	-7.33	-7	-6.67
	-8	-7.67	-7.33	-7	-6.67	-6.33	-6	-5.67	-5.33	-5	Log [Osimertinib]
Trial 1	2.733	2.05	2.385	1.648	1.301	0.816	0.709	0.89	0.988	1.005	Log [BAY-293]
Trial 2	2.477	3.553	2.677	2.596	1.269	0.732	0.861	0.876	0.991	1.014
Trial 3	0.767	1.631	0.962	1.686	1.035	0.606	0.709	0.909	0.995	1.001
Mean	1.992	2.411	2.008	1.976	1.202	0.718	0.76	0.892	0.991	1.007
SD	1.069	1.01	0.918	0.537	0.145	0.106	0.088	0.017	0.003	0.007
GEF: BAY 1:2 ratio
	-10.67	-10.33	-10	-9.67	-9.33	-9	-8.67	-8.33	-8	-7.67
	-8	-7.67	-7.33	-7	-6.67	-6.33	-6	-5.67	-5.33	-5	Log [gefitninib]
Trial 1	0.678	1.299	3.654	1.617	1.423	0.957	1.108	1.12	0.85	1.003	Log [BAY-293]
Trial 2	1.095	1.901	2.196	1.882	6.83	1.998	1.027	0.909	0.905	1.001
Trial 3	2.973	10.447	1.895	2.931	4.019	1.405	0.986	1.043	0.937	1.001
Mean	1.582	4.549	2.582	2.143	4.091	1.453	1.04	1.024	0.897	1.001
SD	1.223	5.117	0.941	0.695	2.705	0.522	0.062	0.107	0.044	0.001
GEF:BAY 1:1 ratio
	-10.33	-10	-9.67	-9.33	-9	-8.67	-8.33	-8	-7.67	-7.33
	-8	-7.67	-7.33	-7	-6.67	-6.33	-6	-5.67	-5.33	-5	Log [gefitninib]
Trial 1	1.031	1.097	1.565	1.054	0.959	1.476	0.979	0.878	0.943	1.001	Log [BAY-293]
Trial 2	2.722	2.706	10.79	1.279	10.86	3.008	1.437	0.937	0.962	1.001
Trial 3	3.494	1.957	6.806	4.369	9.733	1.036	0.86	1.048	0.98	1.001
Mean	2.416	1.92	6.387	2.234	7.184	1.84	1.092	0.954	0.962	1.001
SD	1.259	0.805	4.627	1.852	5.42	1.035	0.305	0.086	0.018	0
GEF:BAY 2:1 ratio
	-10	-9.67	-9.33	-9	-8.67	-8.33	-8	-7.67	-7.33	-7
	-8	-7.67	-7.33	-7	-6.67	-6.33	-6	-5.67	-5.33	-5	Log [gefitninib]
Trial 1	1.233	1.354	3.092	0.965	1.425	1.072	0.785	0.906	0.988	1.022	Log [BAY-293]
Trial 2	2.408	2.668	2.4	3.084	2.556	1.747	0.989	0.893	0.991	1.005
Trial 3	1.264	1.035	1.886	1.822	2.014	1.226	0.767	0.947	0.995	1.007
Mean	1.635	1.686	2.459	1.957	1.998	1.348	0.847	0.916	0.992	1.011
SD	0.67	0.866	0.605	1.066	0.566	0.354	0.123	0.028	0.003	0.009
GEF:OSM 1:2 ratio
	-10.67	-10.33	-10	-9.67	-9.33	-9	-8.67	-8.33	-8	-7.67
	-10	-9.67	-9.33	-9	-8.67	-8.33	-8	-7.67	-7.33	-7	Log [gefitninib]
Trial 1	1.005	6.959	1.737	1.132	1.728	3.962	4.835	3.355	1.343	1.103	Log [Osimertinib]
Trial 2	1.256	1.263	2.548	1.427	3.19	2.774	3.707	1.481	1.257	1.089
Trial 3	1.814	1.466	1.351	2.306	1.48	2.289	0.864	1.495	1.206	1.073
Mean	1.359	3.229	1.879	1.622	2.132	3.008	3.136	2.111	1.269	1.088
SD	0.414	3.232	0.611	0.611	0.924	0.861	2.046	1.078	0.069	0.015
GEF:OSM 1:1 ratio
	-10.33	-10	-9.67	-9.33	-9	-8.67	-8.33	-8	-7.67	-7.33
	-10	-9.67	-9.33	-9	-8.67	-8.33	-8	-7.67	-7.33	-7	Log [gefitninib]
Trial 1	1.303	1.45	12.808	1.987	1.107	1.312	1.994	1.427	1.071	1.02	Log [Osimertinib]
Trial 2	0.622	1.396	1.086	0.833	1.217	0.911	1.549	0.996	1.093	1.018
Trial 3	1.41	1.623	1.456	1.191	1.215	0.749	0.829	1.406	1.163	1.037
Mean	1.112	1.49	5.117	1.337	1.18	0.99	1.457	1.276	1.109	1.025
SD	0.428	0.119	6.663	0.591	0.063	0.29	0.588	0.243	0.048	0.01
GEF:OSM 2:1 ratio
	-10	-9.67	-9.33	-9	-8.67	-8.33	-8	-7.67	-7.33	-7
	-10	-9.67	-9.33	-9	-8.67	-8.33	-8	-7.67	-7.33	-7	Log [gefitninib]
Trial 1	2.154	1.855	2.535	0.987	1.894	1.765	1.373	1.136	1.06	1.003	Log [Osimertinib]
Trial 2	1.618	1.158	1.349	0.837	1.189	1.174	1.038	1.04	1.02	1.013
Trial 3	1.503	3.326	1.637	2.212	2.123	2.357	0.847	1.161	1.027	1.008
Mean	1.758	2.113	1.841	1.345	1.736	1.765	1.086	1.112	1.036	1.008
SD	0.348	1.107	0.618	0.754	0.487	0.592	0.267	0.064	0.021	0.005

## Sheet: PC9TM
OSM: BAY 1:2 ratio
	-10.67	-10.33	-10	-9.67	-9.33	-9	-8.67	-8.33	-8	-7.67	Log [Osimertinib]
	-8	-7.67	-7.33	-7	-6.67	-6.33	-6	-5.67	-5.33	-5	Log [BAY-293]
Trial 1	1.037	1.011	0.699	2.32	2.454	1.126	0.487	0.705	0.925	1.001
Trial 2	0.719	0.512	0.428	0.571	1.186	1.377	0.532	0.679	0.933	1.005
Trial 3	1.022	1.194	0.488	1.01	1.212	1.025	0.413	0.725	0.997	0.993
Mean	0.926	0.906	0.538	1.301	1.617	1.176	0.477	0.703	0.952	1
SD	0.179	0.353	0.142	0.91	0.724	0.181	0.06	0.023	0.039	0.007
OSM:BAY 1:1 ratio
	-10.33	-10	-9.67	-9.33	-9	-8.67	-8.33	-8	-7.67	-7.33	Log [Osimertinib]
	-8	-7.67	-7.33	-7	-6.67	-6.33	-6	-5.67	-5.33	-5	Log [BAY-293]
Trial 1	0.834	0.862	0.81	1.145	5.83	1.807	0.955	0.374	0.721	1.024
Trial 2	0.921	1.322	1.152	1.217	2.112	0.905	0.671	0.362	0.709	1
Trial 3	0.838	1.171	1.093	1.081	5.158	1.436	0.974	0.366	0.699	1.005
Mean	0.865	1.118	1.018	1.148	4.367	1.383	0.866	0.367	0.71	1.01
SD	0.049	0.235	0.182	0.068	1.981	0.453	0.169	0.006	0.011	0.013
OSM:BAY 2:1 ratio
	-10	-9.67	-9.33	-9	-8.67	-8.33	-8	-7.67	-7.33	-7	Log [Osimertinib]
	-8	-7.67	-7.33	-7	-6.67	-6.33	-6	-5.67	-5.33	-5	Log [BAY-293]
Trial 1	0.925	3.269	3.262	1.327	0.927	0.987	1.523	2.102	0.441	1.074
Trial 2	2.522	5.024	3.608	2.114	1.49	1.028	1.353	1.8	0.378	1.001
Trial 3	1.474	1.326	3.337	2.2	1.139	1.044	1.166	1.712	0.349	1.001
Mean	1.64	3.206	3.402	1.88	1.185	1.02	1.347	1.871	0.389	1.025
SD	0.812	1.85	0.182	0.481	0.284	0.029	0.178	0.205	0.047	0.042

## Sheet: H3255
OSM: BAY 1:2 ratio
	-11	-10.67	-10.33	-10	-9.67	-9.33	-9	-8.67	-8.33	-8	Log [Osimertinib]
	-8	-7.67	-7.33	-7	-6.67	-6.33	-6	-5.67	-5.33	-5	Log [BAY-293]
Trial 1	1.0029	1.00586	0.988029	0.913082	0.909976	0.816019	0.837939	0.773051	0.621438	5.0168
Trial 2	1.02749	1.00283	0.997854	0.927387	0.930977	1.10224	0.598163	0.497578	0.680967	0.87731
Trial 3	1.00123	1.00613	0.990716	0.894014	0.98504	1.01846	1.14216	1.10262	1.6018	1.13017
Mean	1.01054	1.00494	0.992199	0.911495	0.941998	0.978906	0.859422	0.791082	0.968068	2.34143
SD	0.0147054	0.00183318	0.00507766	0.016743	0.0387265	0.147153	0.272636	0.302923	0.549635	2.32039
OSM:BAY 1:1 ratio
	-10.67	-10.33	-10	-9.67	-9.33	-9	-8.67	-8.33	-8	-7.67	Log [Osimertinib]
	-8	-7.67	-7.33	-7	-6.67	-6.33	-6	-5.67	-5.33	-5	Log [BAY-293]
Trial 1	1.0034	1.00028	0.976661	0.808608	0.932857	0.8452	1.33906	1.00652	1.16787	0.722956
Trial 2	1.00855	1.00008	0.985088	0.832175	0.808428	0.843836	0.568495	0.517209	1.94143	1.0032
Trial 3	1.00316	1.00025	0.96238	0.804979	0.869685	0.743447	1.0196	1.03092	0.744771	1.07374
Mean	1.00504	1.0002	0.974709	0.815254	0.870323	0.810827	0.975721	0.851549	1.28469	0.933298
SD	0.00304921	0.000104325	0.011479	0.0147661	0.0622171	0.0583575	0.387154	0.289804	0.606821	0.185545
OSM:BAY 2:1 ratio
	-10.33	-10	-9.67	-9.33	-9	-8.67	-8.33	-8	-7.67	-7.33	Log [Osimertinib]
	-8	-7.67	-7.33	-7	-6.67	-6.33	-6	-5.67	-5.33	-5	Log [BAY-293]
Trial 1	1.00262	1.0062	0.977582	0.828435	0.912661	0.966341	0.581228	0.894773	0.845966	1.08773
Trial 2	1.00385	0.994746	0.978666	0.798443	0.731729	0.771869	0.553499	0.918841	0.939862	1.12822
Trial 3	1.00262	1.00391	0.983015	0.842717	0.950311	0.972352	0.741333	1.155	2.46221	1.39257
Mean	1.00303	1.00162	0.979754	0.823198	0.8649	0.903521	0.625353	0.989539	1.41601	1.20284
SD	0.000710671	0.00606086	0.00287527	0.0225969	0.116856	0.114053	0.101394	0.1438	0.90725	0.165553
GEF: BAY 1:2 ratio
	-11.67	-11.33	-11	-10.67	-10.33	-10	-9.67	-9.33	-9	-8.67	Log [gefitninib]
	-8	-7.67	-7.33	-7	-6.67	-6.33	-6	-5.67	-5.33	-5	Log [BAY-293]
Trial 1	1.00028	1.0122	1.01097	0.959472	1.17438	1.265	0.986633	0.878441	3.25578	1.3146
Trial 2	1.07822	1.00271	1.01233	0.900184	0.810185	0.912145	0.636626	0.448138	0.390738	3.54338
Trial 3	1.23367	1.01228	1.01196	0.960298	1.12036	1.24182	0.906301	1.28289	1.98944	0.94887
Mean	1.10406	1.00906	1.01175	0.939985	1.03497	1.13965	0.843187	0.869822	1.87865	1.93562
SD	0.118821	0.00549896	0.00070523	0.0344711	0.196538	0.19737	0.183341	0.417441	1.43573	1.40432
GEF:BAY 1:1 ratio
	-11.33	-11	-10.67	-10.33	-10	-9.67	-9.33	-9	-8.67	-8.33	Log [gefitninib]
	-8	-7.67	-7.33	-7	-6.67	-6.33	-6	-5.67	-5.33	-5	Log [BAY-293]
Trial 1	1.003	1.00695	1.00471	0.946529	0.954416	0.95662	0.72203	0.796844	1.38402	1.67501
Trial 2	1.00569	1.00461	0.997875	0.7849	0.757044	0.823725	0.47951	0.504852	0.407158	2.27517
Trial 3	1.00304	1.00706	1.00438	0.894415	0.935498	0.927324	0.654875	0.701011	1.34385	1.60644
Mean	1.00391	1.0062	1.00232	0.875281	0.882319	0.902556	0.618805	0.667569	1.04501	1.85221
SD	0.0015396	0.00138476	0.00385353	0.0824959	0.108903	0.0698236	0.125219	0.148841	0.552761	0.367899
GEF:BAY 2:1 ratio
	-11	-10.67	-10.33	-10	-9.67	-9.33	-9	-8.67	-8.33	-8	Log [gefitninib]
	-8	-7.67	-7.33	-7	-6.67	-6.33	-6	-5.67	-5.33	-5	Log [BAY-293]
Trial 1	1.00387	1.03072	1.01862	0.932872	0.955675	0.924745	0.865853	2.01457	5.42388	1.43672
Trial 2	1.00329	1.00291	0.969078	0.748366	0.654705	0.82813	0.490006	0.455649	0.561403	1.38938
Trial 3	1.00395	1.03144	1.00431	0.924524	0.916604	0.899086	0.802834	1.15947	1.17473	1.47172
Mean	1.0037	1.02169	0.997337	0.868588	0.842328	0.883987	0.719564	1.2099	2.38667	1.43261
SD	0.000364097	0.0162655	0.0254963	0.104198	0.163657	0.0500457	0.201285	0.780684	2.64811	0.0413245
GEF:OSM 1:2 ratio
	-11.67	-11.33	-11	-10.67	-10.33	-10	-9.67	-9.33	-9	-8.67	Log [gefitninib]
	-10.67	-10.33	-10	-9.67	-9.33	-9	-8.67	-8.33	-8	-7.67	Log [Osimertinib]
Trial 1	1.00267	1.01812	1.14521	1.42649	1.70312	1.79804	1.6692	1.58617	1.87461	2.15432
Trial 2	1.00282	1.02961	1.12858	1.40278	1.36416	1.51805	1.31858	0.90932	0.857452	1.70701
Trial 3	1.00282	1.01709	1.13663	1.40896	1.57617	1.85958	1.65132	1.42551	3.45474	9.83248
Mean	1.00277	1.02161	1.13681	1.41274	1.54782	1.72522	1.54636	1.307	2.06227	4.5646
SD	8.67269e-05	0.00694781	0.00831642	0.0122982	0.171249	0.182034	0.197472	0.353647	1.30877	4.5676
GEF:OSM 1:1 ratio
	-11.33	-11	-10.67	-10.33	-10	-9.67	-9.33	-9	-8.67	-8.33	Log [gefitninib]
	-10.67	-10.33	-10	-9.67	-9.33	-9	-8.67	-8.33	-8	-7.67	Log [Osimertinib]
Trial 1	1.00423	1.01247	1.07501	1.18608	1.11885	1.23546	2.48009	1.61919	3.79287	2.10184
Trial 2	1.00402	1.01287	1.04623	1.1326	1.35551	1.83766	1.0705	1.59254	1.56292	3.36431
Trial 3	1.00428	1.01282	1.07964	1.20927	1.17071	1.38246	4.05753	2.17937	2.06103	2.9914
Mean	1.00417	1.01272	1.06696	1.17598	1.21502	1.48519	2.53604	1.79703	2.47227	2.81918
SD	0.000140951	0.000214749	0.0180984	0.039321	0.124401	0.313973	1.4943	0.331378	1.17047	0.648614
GEF:OSM 2:1 ratio
	-11	-10.67	-10.33	-10	-9.67	-9.33	-9	-8.67	-8.33	-8	Log [gefitninib]
	-10.67	-10.33	-10	-9.67	-9.33	-9	-8.67	-8.33	-8	-7.67	Log [Osimertinib]
Trial 1	1.00265	0.996299	0.953888	0.921079	0.928143	0.968444	1.16052	2.43063	3.61676	3.08277
Trial 2	1.00326	1.00921	0.970715	0.932942	0.920634	1.00434	0.948209	1.53906	0.761055	1.57837
Trial 3	1.00232	0.996003	0.952482	0.91116	0.88981	0.934008	0.940365	0.861122	1.24344	1.28273
Mean	1.00275	1.0005	0.959028	0.921727	0.912862	0.96893	1.01637	1.61027	1.87375	1.98129
SD	0.000478357	0.00754161	0.0101456	0.0109058	0.0203136	0.0351671	0.124906	0.787171	1.52864	0.965295

## Sheet: H3255-TM
OSM: BAY 1:2 ratio
	-10.33	-10	-9.67	-9.33	-9	-8.67	-8.33	-8	-7.67	-7.33	Log [Osimertinib]
	-8	-7.67	-7.33	-7	-6.67	-6.33	-6	-5.67	-5.33	-5	Log [BAY-293]
Trial 1	1.004	2.127	4.409	1.137	0.276	0.468	0.64	0.934	0.945	0.969
Trial 2	1.007	2.071	0.666	4.869	0.61	0.572	0.851	0.956	0.984	1.007
Trial 3	1.015	2.823	1.915	2.288	0.413	0.549	0.801	0.842	0.954	0.98
Mean	1.009	2.341	2.33	2.765	0.433	0.53	0.764	0.911	0.961	0.985
SD	0.006	0.419	1.906	1.911	0.167	0.055	0.11	0.061	0.021	0.02
OSM:BAY 1:1 ratio
	-10	-9.67	-9.33	-9	-8.67	-8.33	-8	-7.67	-7.33	-7	Log [Osimertinib]
	-8	-7.67	-7.33	-7	-6.67	-6.33	-6	-5.67	-5.33	-5	Log [BAY-293]
Trial 1	4.075	1.137	2.367	1.463	0.713	0.399	0.819	1.009	0.918	0.996
Trial 2	0.84	0.853	0.891	2.451	0.574	0.685	0.746	1.029	0.966	0.993
Trial 3	1.095	0.514	0.688	0.321	0.692	0.641	0.649	0.764	0.941	1.005
Mean	2.003	0.835	1.315	1.412	0.66	0.575	0.738	0.934	0.942	0.998
SD	1.799	0.312	0.916	1.066	0.075	0.154	0.086	0.147	0.024	0.006
OSM:BAY 2:1 ratio
	-9.67	-9.33	-9	-8.67	-8.33	-8	-7.67	-7.33	-7	-6.67	Log [Osimertinib]
	-8	-7.67	-7.33	-7	-6.67	-6.33	-6	-5.67	-5.33	-5	Log [BAY-293]
Trial 1	1.316	1.924	1.3	0.976	0.647	0.851	1.08	0.935	0.993	1.255
Trial 2	0.858	0.702	0.865	0.934	0.687	0.581	1.065	0.974	0.996	1.956
Trial 3	1.439	0.89	0.456	0.999	1.011	0.975	0.707	0.965	1.01	1.234
Mean	1.204	1.172	0.874	0.97	0.782	0.802	0.951	0.958	0.999	1.482
SD	0.306	0.658	0.422	0.033	0.2	0.202	0.211	0.021	0.009	0.411
