# Supplementary material for: Marked synergy by vertical inhibition of EGFR signaling in NSCLC spheroids shows SOS1 is a therapeutic target in EGFR-mutated cancer
Source: eLife. 2020 Sep 8;9:e58204. doi: 10.7554/eLife.58204 (PMC7478890; doi:10.7554/eLife.58204)
Supplement: Figure 5—source data 1. [file elife-58204-fig5-data1.xlsx]

## Sheet: Fig 5A
	1975 NT												1975 SOS2 KO
	Osimertinib	100	80	66	50	34	20	0				Osimertinib	100	80	66	50	34	20	0
	BAY-293	0	20	34	50	66	80	100				BAY-293	0	20	34	50	66	80	100
Osimertinib IC50	Trial 1	2.59	0.840075	0.66525	0.52942	0.50047	0.390195	0			Osimertinib IC50	Trial 1	1.456	0.950475	0.7785	0.6874	0.82105	0.71985	0
	Trial 2	2.612	0.888975	0.57633	0.48923	0.66695	0.54495	0				Trial 2	1.77	0.8554	0.644247	0.50065	0.314422	0.16855	0
	Trial 3	1.587	0.79264	0.77155	0.6045	0.57015	0.44	0				Trial 3	2.863	0.99564	0.689488	0.379683	0.2961	0.1766	0
	Trial 4	2.851	0.839754	0.600145	0.518	0.24101	0.45987	0				Trial 4	1.474	1.1176	0.9945	0.6485	0.7427	0.6082	0
	Average	2.41	0.840361	0.653319	0.535288	0.494645	0.458754	0				Average	1.89075	0.979779	0.776684	0.554058	0.543568	0.4183	0
	SD	0.561253	0.0393322	0.0873226	0.0491425	0.18235	0.0645059	0				SD	0.663963	0.108896	0.155553	0.141372	0.277127	0.287395	0
BAY-293 IC50	Trial 1	0	0.04845	0.077695	0.12544	0.27485	0.338732	1.491			BAY-293 IC50	Trial 1	0	0.00584625	0.0090495	0.015714	0.0354925	0.0522625	0.1743
	Trial 2	0	0.05268	0.06254	0.13043	0.42373	0.55242	1.904				Trial 2	0	0.0459	0.0749	0.108433	0.126523	0.14116	0.2338
	Trial 3	0	0.019816	0.041545	0.06045	0.105885	0.176	1.425				Trial 3	0	0.05373	0.08071	0.08265	0.11882	0.152	0.2349
	Trial 4	0	0.042956	0.323715	0.5185	0.44798	0.35791	1.516				Trial 4	0	0.006052	0.0115955	0.01401	0.0297765	0.05284	0.1835
	Average	0	0.0409755	0.126374	0.208705	0.313111	0.356266	1.584				Average	0	0.0278821	0.0440638	0.0552018	0.0776529	0.0995656	0.206625
	SD	0	0.0146573	0.132393	0.208976	0.157937	0.154145	0.216759				SD	0	0.025527	0.039047	0.04776	0.05213	0.0544681	0.0322368
Combination Index	Osimertinib		80	66	50	34	20				Combination Index	Osimertinib		80	66	50	34	20
	BAY-293		20	34	50	66	80					BAY-293		20	34	50	66	80
	Trial 1		0.356848	0.308963	0.288541	0.377571	0.377839					Trial 1		0.68634	0.586603	0.56227	0.767537	0.794245
	Trial 2		0.368011	0.253494	0.255804	0.477888	0.49877					Trial 2		0.679598	0.684341	0.74664	0.718797	0.69899
	Trial 3		0.513364	0.515323	0.423328	0.433568	0.400761					Trial 3		0.576497	0.58442	0.484469	0.609255	0.708767
	Trial 4		0.412741	0.424036	0.523709	0.380037	0.42579					Trial 4		0.79119	0.737885	0.516308	0.666137	0.700575
	Average		0.412741	0.375454	0.372846	0.417266	0.42579					Average		0.683406	0.648312	0.577422	0.690431	0.725644
	SD		0.071297	0.117216	0.123982	0.047967	0.052446					SD		0.0876928	0.0757444	0.117245	0.0681411	0.0459339

## Sheet: Fig 5B
	1975 NT										1975 SOS2 KO
	Osimertinib	100	66	50	34	0				Osimertinib	100	66	50	34	0
	BAY-293	0	34	50	66	100				BAY-293	0	34	50	66	100
Osimertinib IC50	Trial 1	61.34	18.8825	13.92	7.7525	0			Osimertinib IC50	Trial 1	65.97	28.8405	12.42	12.551	0
	Trial 2	46.69	11.9925	7.935	8.3265	0				Trial 2	56.18	22.7305	19.27	7.378	0
	Trial 3	40.12	14.651	8.265	13.0655	0				Trial 3	65.47	38.0575	17.105	8.939	0
	Average	49.3833	15.1753	10.04	9.71483	0				Average	62.54	29.8762	16.265	9.62267	0
	SD	10.8634	3.4748	3.36423	2.91592	0				SD	5.51359	7.71581	3.5014	2.6534	0
BAY-293 IC50	Trial 1	0	1.01675	1.595	1.43975	5.863			BAY-293 IC50	Trial 1	0	0.7497	1.0415	1.1336	2.033
	Trial 2	0	0.64575	0.7935	1.54635	8.326				Trial 2	0	0.5943	0.9335	0.65325	1.481
	Trial 3	0	0.7889	0.8265	1.57495	6.013				Trial 3	0	1.0129	0.8295	0.7943	1.478
	Average	0	0.817133	1.07167	1.52035	6.734				Average	0	0.785633	0.934833	0.860383	0.1835
	SD	0	0.187104	0.45352	0.0712514	1.38075				SD	0	0.211601	0.106006	0.246899	1.0475
															0.748247
Combination Index	Osimertinib		66	50	34				Combination Index	Osimertinib		66	50	34
	BAY-293		34	50	66					BAY-293		34	50	66
	Trial 1		0.481251	0.498977	0.371951					Trial 1		0.805941	0.700564	0.747853
	Trial 2		0.334412	0.265255	0.364061					Trial 2		0.805884	0.973322	0.572415
	Trial 3		0.496379	0.343459	0.587585					Trial 3		1.26661	0.822496	0.673951
	Average		0.437347	0.36923	0.441199					Average		0.95948	0.832128	0.66474
	SD		0.0894649	0.118973	0.126835					SD		0.265986	0.136634	0.0880809

## Sheet: Fig 5C
H3255-TM - NT														H3255-TM - SOS2 KO
OSM: BAY 1:2 ratio														OSM: BAY 1:2 ratio
	-10.33	-10	-9.67	-9.33	-9	-8.67	-8.33	-8	-7.67	-7.33	Log [Osimertinib]				-10.33	-10	-9.67	-9.33	-9	-8.67	-8.33	-8	-7.67	-7.33	Log [Osimertinib]
	-8	-7.67	-7.33	-7	-6.67	-6.33	-6	-5.67	-5.33	-5	Log [BAY-293]				-8	-7.67	-7.33	-7	-6.67	-6.33	-6	-5.67	-5.33	-5	Log [BAY-293]
Trial 1	0.843	0.665	0.862	0.813	0.859	0.812	0.835	0.758	1.019	1.003				Trial 1	0.903	1.394	0.637	1.052	0.742	0.742	0.93	0.991	0.974	0.995
Trial 2	5.981	5.062	1.459	1.002	1.505	0.969	0.967	0.871	1.079	1.01				Trial 2	1.123	1.356	1.875	1.041	0.992	0.898	0.897	0.843	0.961	0.987
Trial 3	1.545	2.135	1.256	0.922	1.123	0.802	0.929	0.854	1.055	1.005				Trial 3	1.546	1.565	1.745	1.095	0.718	0.776	0.867	1.002	0.986	0.994
Mean	2.79	2.621	1.192	0.912	1.162	0.861	0.91	0.828	1.051	1.006				Mean	1.191	1.438	1.419	1.063	0.817	0.805	0.898	0.945	0.974	0.992
SD	2.786	2.238	0.304	0.095	0.325	0.094	0.068	0.061	0.03	0.004				SD	0.327	0.111	0.68	0.028	0.152	0.082	0.032	0.089	0.013	0.004
OSM:BAY 1:1 ratio														OSM:BAY 1:1 ratio
	-10	-9.67	-9.33	-9	-8.67	-8.33	-8	-7.67	-7.33	-7	Log [Osimertinib]				-10	-9.67	-9.33	-9	-8.67	-8.33	-8	-7.67	-7.33	-7	Log [Osimertinib]
	-8	-7.67	-7.33	-7	-6.67	-6.33	-6	-5.67	-5.33	-5	Log [BAY-293]				-8	-7.67	-7.33	-7	-6.67	-6.33	-6	-5.67	-5.33	-5	Log [BAY-293]
Trial 1	0.454	0.271	0.845	0.754	0.769	0.913	0.862	0.987	1.011	1.003				Trial 1	0.981	1.356	0.844	0.744	1.09	0.725	0.897	0.897	0.941	1.006
Trial 2	0.423	0.381	0.684	0.652	0.727	0.697	0.744	0.776	1.006	1.001				Trial 2	1.587	0.935	1.151	0.971	0.847	1.047	0.893	0.96	0.926	0.982
Trial 3	0.401	0.339	0.864	0.775	0.674	0.936	0.835	0.938	1.025	1.006				Trial 3	1.479	1.324	0.801	0.714	0.917	0.874	0.91	0.981	1.027	0.979
Mean	0.426	0.33	0.798	0.727	0.723	0.849	0.814	0.9	1.014	1.003				Mean	1.349	1.205	0.932	0.81	0.951	0.882	0.9	0.946	0.965	0.989
SD	0.027	0.055	0.099	0.066	0.047	0.132	0.062	0.11	0.01	0.003				SD	0.323	0.234	0.191	0.141	0.125	0.161	0.009	0.044	0.054	0.015
OSM:BAY 2:1 ratio														OSM:BAY 2:1 ratio
	-9.67	-9.33	-9	-8.67	-8.33	-8	-7.67	-7.33	-7	-6.67	Log [Osimertinib]				-9.67	-9.33	-9	-8.67	-8.33	-8	-7.67	-7.33	-7	-6.67	Log [Osimertinib]
	-8	-7.67	-7.33	-7	-6.67	-6.33	-6	-5.67	-5.33	-5	Log [BAY-293]				-8	-7.67	-7.33	-7	-6.67	-6.33	-6	-5.67	-5.33	-5	Log [BAY-293]
Trial 1	0.642	1.331	0.936	1.095	0.904	0.864	0.967	0.944	1.016	1.003				Trial 1	1.587	1.85	0.835	5.106	2.046	2.407	1.581	1.953	1.968	1.003
Trial 2	0.98	3.914	1.162	1.066	1.36	0.841	1.106	1.001	1.054	1.006				Trial 2	1.27	1.089	3.094	1.771	2.624	1.857	1.691	1.712	1.572	1.002
Trial 3	0.662	2.755	1.022	1.146	1.256	0.842	1.127	0.987	1.033	1.015				Trial 3	1.79	2.145	2.688	2.123	2.945	2.365	1.235	1.911	1.845	1.009
Mean	0.761	2.666	1.04	1.102	1.174	0.849	1.066	0.977	1.034	1.008				Mean	1.549	1.695	2.206	3	2.539	2.21	1.502	1.859	1.795	1.005
SD	0.19	1.294	0.114	0.04	0.239	0.013	0.087	0.03	0.019	0.006				SD	0.19	1.294	0.114	0.04	0.239	0.013	0.087	0.03	0.019	0.006
