# Supplementary material for: Marked synergy by vertical inhibition of EGFR signaling in NSCLC spheroids shows SOS1 is a therapeutic target in EGFR-mutated cancer
Source: eLife. 2020 Sep 8;9:e58204. doi: 10.7554/eLife.58204 (PMC7478890; doi:10.7554/eLife.58204)
Supplement: Figure 6—source data 1. [file elife-58204-fig6-data1.xlsx]

## Sheet: Fig 6 B and E
		NT						BAY-293						SOS2 KO						SOS2 KO + BAY-293						P-values
		Trial 1	Trial 2	Trial 3	Mean	SD		Trial 1	Trial 2	Trial 3	Mean	SD		Trial 1	Trial 2	Trial 3	Mean	SD		Trial 1	Trial 2	Trial 3	Mean	SD			no tx	-9	-8	-7	-6	-5	Log [OSM]
H1975	no tx	100	100	100	100	0		77.5893	78.8612	72.7199	76.3901	3.24149		92.7878	94.7695	93.9399	93.8324	0.995194		8.72708	14.9347	21.1423	14.9347	6.20762		NT vs. NT + BAY	0.0246	<0.0001	<0.0001	0.0004	0.1441	0.6547
pERK	-9	85.9502	96.3829	97.269	93.2007	6.29471		40.1113	47.3963	51.0976	46.2017	5.58972		56.8492	87.0024	84.8421	76.2312	16.8201		5.22512	13.1837	21.1423	13.1837	7.9586		NT vs. SOS2	0.8676	0.2221	0.0808	0.0051	0.1519	0.6865
	-8	70.6235	95.3394	96.3298	87.4309	14.564		48.0487	27.2422	31.508	35.5996	10.9902		53.4608	71.8509	72.735	66.0156	10.8818		5.93651	11.8817	17.8268	11.8817	5.94517		NT vs. SOS2 + BAY	<0.0001	<0.0001	<0.0001	<0.0001	0.0754	0.6885
	-7	45.9161	72.925	59.8219	59.5543	13.5064		17.5961	35.2433	10.6214	21.1536	12.6906		13.6847	48.2735	23.9394	28.6325	17.7656		9.94315	17.1477	24.3521	17.1477	7.2045		NT + BAY vs. SOS2	0.1442	0.0068	0.006	0.8244	>0.9999	>0.9999
	-6	14.1545	48.0216	33.1233	31.7665	16.9743		11.4191	19.7545	7.15716	12.7769	6.40747		10.5348	13.0137	15.4926	13.0137	2.47891		11.0302	10.0782	9.12623	10.0782	0.95197		NT + BAY vs. SOS2 + BAY	<0.0001	0.0026	0.0442	0.967	0.9894	>0.9999
	-5	16.3733	26.8598	37.3462	26.8598	10.4865		12.7272	29.4726	8.15777	16.7859	11.2221		21	17.2399	13.4799	17.2399	3.76006		9.60181	17.2681	24.9344	17.2681	7.66631		SOS2 vs. SOS2 + BAY	<0.0001	<0.0001	<0.0001	0.5539	0.9865	>0.9999
	Log [OSM]
		Trial 1	Trial 2	Trial 3	Mean	SD		Trial 1	Trial 2	Trial 3	Mean	SD		Trial 1	Trial 2	Trial 3	Mean	SD		Trial 1	Trial 2	Trial 3	Mean	SD			no tx	-9	-8	-7	-6	-5	Log [OSM]
H1975		100	100	100	100	0		85.0049	74.5886	87.5672	82.3869	6.87399		92.6142	94.1918	97.7695	94.8585	2.6415		37.3886	44.4789	55.5691	45.8122	9.16333		NT vs. NT + BAY	0.073	0.006	0.0002	0.0571	0.9262	0.9855
pAKT		88.2157	73.6024	98.4567	86.7582	12.4911		62.99	46.3963	77.5473	62.3112	15.5866		96.0172	98.0098	78.0024	90.6765	11.0212		57.0594	40.6189	75.1784	57.6189	17.2865		NT vs. SOS2	0.8849	0.9445	0.8485	0.9027	0.9037	0.9999
		54.5715	63.1529	64.5419	60.7554	5.40031		24.6696	27.2422	34.9762	28.9627	5.3644		61.108	66.4795	71.8509	66.4795	5.37144		15.4142	24.8565	35.2987	25.1898	9.94647		NT vs. SOS2 + BAY	<0.0001	0.0008	<0.0001	0.5606	0.8324	0.3953
		32.7598	48.964	46.3137	42.6792	8.69201		18.001	35.2433	19.6999	24.3147	9.50248		25.7754	49.5244	38.2735	37.8578	11.88		26.2639	36.7703	37.2766	33.4369	6.21722		NT + BAY vs. SOS2	0.3006	0.0011	<0.0001	0.233	>0.9999	0.9755
		23.2596	31.2829	20.4157	24.9861	5.63555		15.2571	19.7545	26.8966	20.6361	5.86964		19.6606	19.8303	21.0565	20.1824	0.761672		16.7175	19.0249	21.3324	19.0249	2.30744		NT + BAY vs. SOS2 + BAY	<0.0001	0.9095	0.95	0.5712	0.9957	0.6044
		16.7068	32.7892	17.8472	22.4477	8.97409		18.3246	29.4726	12.2132	20.0034	8.75132		14.5505	22.9369	31.3234	22.9369	8.38645		12.2297	11.256	10.2824	11.256	0.973632		SOS2 vs. SOS2 + BAY	<0.0001	0.0001	<0.0001	0.9229	0.9984	0.3574
		Trial 1	Trial 2	Trial 3	Mean	SD		Trial 1	Trial 2	Trial 3	Mean	SD		Trial 1	Trial 2	Trial 3	Mean	SD		Trial 1	Trial 2	Trial 3	Mean	SD			no tx	-9	-8	-7	-6	-5	Log [OSM]
PC9		100	100	100	100	0		88.2908	95.0044	62.298	81.8644	17.2743		92.3588	90.8362	88.0261	90.407	2.19799		10.4489	37.6714	18.4123	22.1776	13.9964		NT vs. NT + BAY	0.1488	0.0011	<0.0001	0.8541	0.9224	0.8335
pERK		84.0511	98.7454	97.0918	93.2961	8.04902		58.2056	84.9916	34.9477	59.3816	25.0427		65.0753	75.7664	73.4276	71.4231	5.62035		1.97727	29.6838	10.6258	14.0956	14.1755		NT vs. SOS2	0.6648	0.0568	0.0116	0.6192	0.9085	0.8331
		66.5213	54.7969	51.5295	57.6159	7.88346		32.6225	13.0394	5.62034	17.0941	13.9503		23.9034	33.9281	33.7441	30.5252	5.73537		2.19435	3.25558	2.68441	2.71144	0.531133		NT vs. SOS2 + BAY	<0.0001	<0.0001	<0.0001	0.3938	0.7743	0.6973
		37.6108	7.19255	4.73676	16.5134	18.3121		19.6829	8.11245	1.60784	9.80105	9.15507		9.55896	6.16239	3.18446	6.30193	3.18954		0.665566	5.2799	3.57152	3.17233	2.33292		NT + BAY vs. SOS2	0.7397	0.4841	0.3879	0.9753	>0.9999	>0.9999
		26.3443	6.96958	4.26771	12.5272	12.042		10.5933	7.53576	3.6325	7.25386	3.48897		10.2564	7.22879	3.27498	6.92004	3.50091		7.36254	3.37315	2.761	4.4989	2.4988		NT + BAY vs. SOS2 + BAY	<0.0001	<0.0001	0.3277	0.8586	0.9876	0.9947
		29.8097	6.15219	6.47068	14.1442	13.5677		8.40957	9.34519	3.4487	7.06782	3.16897		9.4804	7.74264	3.96054	7.06119	2.82232		4.47937	8.08628	2.43243	4.99936	2.86257		SOS2 vs. SOS2 + BAY	<0.0001	<0.0001	0.0092	0.9821	0.9915	0.9947
		Trial 1	Trial 2	Trial 3	Mean	SD		Trial 1	Trial 2	Trial 3	Mean	SD		Trial 1	Trial 2	Trial 3	Mean	SD		Trial 1	Trial 2	Trial 3	Mean	SD			no tx	-9	-8	-7	-6	-5	Log [OSM]
PC9		100	100	100	100	0		97.2505	88.9252	92.4339	92.8699	4.17973		98.5314	97.6939	96.617	97.6141	0.959681		91.5544	83.9827	78.441	84.6594	6.58287		NT vs. NT + BAY	0.6782	<0.0001	0.0027	0.9945	0.9986	0.9994
pAKT		76.4593	99.646	98.6751	91.5935	13.1156		60.4522	68.8798	40.8458	56.7259	14.3837		97.1041	68.5109	92.4818	86.0323	15.349		58.6462	46.0774	43.292	49.3385	8.18009		NT vs. SOS2	0.9818	0.8179	0.9375	0.9843	0.9978	0.9828
		38.8638	32.9322	43.4033	38.3998	5.25095		26.3412	5.61965	11.9337	14.6315	10.6209		50.2768	28.9183	24.9351	34.7101	13.6275		22.7617	3.24091	1.95396	9.31884	11.6596		NT vs. SOS2 + BAY	0.0882	<0.0001	0.0002	>0.9999	>0.9999	0.9982
		12.0572	6.43018	1.50596	6.66443	5.2795		11.7935	5.05952	7.88929	8.24742	3.38122		8.54318	2.75596	1.90036	4.39983	3.61366		11.3546	4.51261	3.24073	6.36931	4.36396		NT + BAY vs. SOS2	0.8778	0.0002	0.0141	0.9299	>0.9999	0.9945
		12.2421	6.48331	2.24718	6.99085	5.01673		10.1559	5.06441	2.7411	5.98715	3.79257		8.9815	5.54527	2.93255	5.81977	3.0338		13.0218	4.23203	3.42674	6.89352	5.32248		NT + BAY vs. SOS2 + BAY	0.5728	0.6534	0.8373	0.9909	0.999	>0.9999
		7.90967	6.80506	1.80998	5.50823	3.25006		10.543	5.93299	2.31702	6.26434	4.12299		16.2772	4.70535	2.55976	7.84743	7.37878		11.7013	4.22607	3.87828	6.6019	4.41967		SOS2 vs. SOS2 + BAY	0.1887	<0.0001	0.0012	0.9896	0.9983	0.9973

## Sheet: Fig 6 C and F
							***
		BAY-293					Is it different than 1?			SOS2 KO					Is it different than 1?			SOS2 KO + BAY-293					Is it different than 1?
		Trial 1	Trial 2	Trial 3	Mean	SD	T-value	significance?		Trial 1	Trial 2	Trial 3	Mean	SD	T-value	significance?		Trial 1	Trial 2	Trial 3	Mean	SD	T-value	significance?
H1975	no tx																	0.306845	0.296991	0.401825	0.33522	0.0578913	-19.8896	yes
pERK	-9	0.55623	0.456076	0.598459	0.536921	0.0731291	-10.9679	yes		0.469254	0.666161	0.569053	0.568156	0.0984565	-7.59702	yes		0.397441	0.321218	0.424338	0.380999	0.0534901	-20.0437	yes
	-8	0.667045	0.341052	0.437264	0.481787	0.167495	-5.3588	yes		0.640977	0.342725	0.348723	0.444142	0.170491	-5.64708	yes		0.475935	0.32506	0.414647	0.405214	0.0758783	-13.577	yes
	-7	0.781201	0.656155	0.632115	0.689824	0.0800424	-6.71196	yes		0.664951	0.597167	0.575901	0.612673	0.0465056	-14.4256	yes		0.723933	0.541925	0.764138	0.676665	0.118408	-4.7297	yes
	-6	1.00493	0.774243	0.817648	0.865607	0.122594	-1.89875			0.970952	0.626422	0.815125	0.804166	0.172526	-1.96604			0.978249	0.700174	0.827096	0.835173	0.139213	-2.05073
	-5	1.00027	1.11755	0.793119	0.970313	0.164277	-0.313007			1.07351	0.900738	0.750311	0.908187	0.16173	-0.983274			0.945915	0.946535	0.964704	0.952385	0.0106736	-7.72676
	Log [OSM]
		Trial 1	Trial 2	Trial 3	Mean	SD				Trial 1	Trial 2	Trial 3	Mean	SD				Trial 1	Trial 2	Trial 3	Mean	SD
H1975																		0.339769	0.535718	0.323784	0.399757	0.118017	-8.80937	yes
pAKT		0.675828	0.841379	0.613925	0.710377	0.117597	-4.26578	yes		4.5947	15.412	0.169994	6.72555	7.84122	1.26472			0.705388	0.800094	0.632463	0.712648	0.0840506	-5.92152	yes
		0.711686	0.727003	0.668716	0.702468	0.0302167	-17.0548	yes		1.2717	1.20867	1.3108	1.26372	0.0515315	8.8641			0.662422	0.725856	0.688494	0.692257	0.0318841	-16.7176	yes
		0.87992	0.980262	0.740278	0.86682	0.120527	-1.91388			0.938499	1.06745	0.88648	0.964142	0.0931684	-0.666621			0.986218	1.01366	0.957398	0.985757	0.0281318	-0.87691
		0.946724	0.955399	1.12338	1.0085	0.0995796	0.147839			0.976585	0.879809	1.01388	0.95676	0.0692015	-1.08227			0.96045	0.938478	1.04338	0.980768	0.0553216	-0.602136
		1.05048	1.07112	0.961098	1.02756	0.0584792	0.816416			0.989206	0.896867	1.20202	1.02937	0.156492	0.325014			0.968464	0.844898	0.939221	0.917527	0.0645763	-2.21206
		Trial 1	Trial 2	Trial 3	Mean	SD				Trial 1	Trial 2	Trial 3	Mean	SD				Trial 1	Trial 2	Trial 3	Mean	SD
PC9																		0.206091	0.219829	0.553533	0.326484	0.19675	-5.92917	yes
pERK		0.617083	0.412268	0.607414	0.545588	0.11556	-6.81087	yes		0.640563	0.425171	0.546953	0.537562	0.108003	-7.41615	yes		0.318046	0.210091	0.520213	0.34945	0.157428	-7.15746	yes
		0.612486	0.55129	0.719415	0.627731	0.0850929	-7.57748	yes		0.506747	0.76015	0.82469	0.697196	0.168061	-3.12073	yes		0.461697	0.540572	0.69224	0.564836	0.117171	-6.4327	yes
		0.831617	1.01392	0.98635	0.943963	0.0982658	-0.98772			0.72161	0.996046	0.989825	0.902493	0.156681	-1.0779			0.686712	0.981241	0.920903	0.862952	0.155582	-1.52572
		0.858329	1.00989	1.01011	0.959441	0.0875653	-0.802261			0.843165	1.00968	0.99502	0.949288	0.0921968	-0.952703			0.833353	0.963848	0.915437	0.904213	0.0659679	-2.51499
		0.804459	1.03861	0.993968	0.945679	0.124321	-0.756798			0.800579	1.02335	0.981931	0.935287	0.118484	-0.946006			0.779264	1.02087	0.902011	0.900714	0.120806	-1.42352
		Trial 1	Trial 2	Trial 3	Mean	SD				Trial 1	Trial 2	Trial 3	Mean	SD				Trial 1	Trial 2	Trial 3	Mean	SD
PC9																		0.49467	0.819458	0.495994	0.603374	0.187135	-3.67101	yes
pAKT		0.648403	0.365986	0.148607	0.387666	0.250602	-4.23218	yes		8.51684	0.0842158	0.620235	3.07376	4.72146	0.760754			0.646033	0.249083	0.20931	0.368142	0.241481	-4.53208	yes
		0.844498	0.749255	0.679949	0.757901	0.0826145	-5.07572	yes		1.24101	0.954216	0.773532	0.989586	0.235737	-0.0765191			0.811908	0.734275	0.621628	0.722604	0.0956756	-5.02181	yes
		1.00077	0.993064	1.07054	1.02146	0.0426796	0.870769			0.963514	0.963741	1.00454	0.977265	0.0236209	-1.66709			0.996955	0.983752	1.01438	0.998363	0.0153636	-0.184551
		0.980527	0.992617	1.00683	0.993324	0.0131639	-0.878444			0.966152	0.991652	1.00784	0.988549	0.0210182	-0.943618			1.01403	0.98039	1.00952	1.00131	0.0182599	0.124599
		1.03187	0.998741	1.00659	1.0124	0.0173103	1.24079			1.10133	0.979613	1.00832	1.02976	0.0636262	0.810013			1.04584	0.977428	1.0183	1.01386	0.0344227	0.697248
	*** For significance on a 1-tailed T Test , T-value < -2.919986 indicates significance with a sample size of 3
