# Supplementary material for: Marked synergy by vertical inhibition of EGFR signaling in NSCLC spheroids shows SOS1 is a therapeutic target in EGFR-mutated cancer
Source: eLife. 2020 Sep 8;9:e58204. doi: 10.7554/eLife.58204 (PMC7478890; doi:10.7554/eLife.58204)
Supplement: Figure 7—source data 1. [file elife-58204-fig7-data1.xlsx]

## Sheet: Fig 7B
	H1975	NT							H1975	SOS2 KO							PC9-TM	NT							PC9-TM	SOS2 KO							H3255-TM	NT							PC9-TM	SOS2 KO
Trial 1	OSM							Trial 1	OSM							Trial 1	OSM							Trial 1	OSM							Trial 1	OSM							Trial 1	OSM
	BAY	0.597717							BAY	0.835571							BAY	0.6607							BAY	0.927628							BAY	0.559592							BAY	0.612256
	RCM	0.744967	0.423266						RCM	0.612935	0.613595						RCM	0.750676	0.837895						RCM	1.0944	0.513407						RCM	0.726445	0.917961						RCM	0.742352	0.734384
	PI3K	0.632252	0.821332	0.693505					PI3K	0.992699	0.918544	1.11971					PI3K	1.03565	1.2557	1.26389					PI3K	1.56703	2.3721	1.56872					PI3K	0.859173	0.710648	0.981726					PI3K	0.961403	0.909846	0.973379
	MEK	1.20405	0.779263	0.759321	6.00873				MEK	1.34109	0.79323	0.660017	2.2503				MEK	1.55218	1.30093	1.90237	1.19926				MEK	1.60762	1.72125	1.59985	1.42653				MEK	0.939477	0.958467	0.996627	0.952863				MEK	0.980243	0.876767	0.949552	0.998452
		OSM	BAY	RCM	PI3K	MEK				OSM	BAY	RCM	PI3K	MEK				OSM	BAY	RCM	PI3K	MEK				OSM	BAY	RCM	PI3K	MEK				OSM	BAY	RCM	PI3K	MEK				OSM	BAY	RCM	PI3K	MEK
Trial 2	OSM							Trial 2	OSM							Trial 2	OSM							Trial 2	OSM							Trial 2	OSM							Trial 2	OSM
	BAY	0.289408							BAY	1.57823							BAY	0.598192							BAY	0.952077							BAY	0.767069							BAY	0.989966
	RCM	0.877795	0.794118						RCM	1.04592	0.476337						RCM	0.723858	0.436604						RCM	0.560715	0.51959						RCM	0.806936	0.851819						RCM	1.00867	0.904263
	PI3K	0.8701	1.02661	0.939371					PI3K	1.57823	0.776984	0.912099					PI3K	1.04239	2.00686	2.5221					PI3K	1.13236	1.15877	0.662852					PI3K	0.51677	1.00309	0.937038					PI3K	0.7165	1.00187	0.972864
	MEK	0.808393	1.29643	2.51581	3.00246				MEK	2.41048	0.707021	0.567544	3.11044				MEK	1.27801	2.85932	0.992124	1.55067				MEK	0.487564	0.154914	0.566211	0.447955				MEK	0.982268	0.869207	0.796769	0.930059				MEK	1.00537	0.765883	1.00679	0.994915
		OSM	BAY	RCM	PI3K	MEK				OSM	BAY	RCM	PI3K	MEK				OSM	BAY	RCM	PI3K	MEK				OSM	BAY	RCM	PI3K	MEK				OSM	BAY	RCM	PI3K	MEK				OSM	BAY	RCM	PI3K	MEK
Trial 3	OSM							Trial 3	OSM							Trial 3	OSM							Trial 3	OSM							Trial 3	OSM							Trial 3	OSM
	BAY	0.675487							BAY	0.972491							BAY	0.764287							BAY	1.01277							BAY	0.639747							BAY	0.97514
	RCM	0.594768	0.479238						RCM	1.61343	0.634115						RCM	0.721482	0.534415						RCM	0.946221	0.254448						RCM	0.626365	0.603104		0				RCM	0.802399	0.582135		0
	PI3K	0.86976	0.69649	0.947253					PI3K	0.51347	1.12193	1.01695					PI3K	1.13117	0.679305	1.61436					PI3K	0.923455	0.442639	0.455439					PI3K	1.40196	0.098452	0.912748					PI3K	1.03505	1.40294	1.15096
	MEK	0.913851	2.75926	0.321073	2.84014				MEK	1.02177	0.808133	1.77865	2.47144				MEK	0.725367	0.534919	13.6927	0.433121				MEK	0.975117	0.173875	0.532709	0.419677				MEK	0.989269	1.47628	0.707756	3.45085				MEK	1.57342	0.671859	1.10936	1
		OSM	BAY	RCM	PI3K	MEK				OSM	BAY	RCM	PI3K	MEK				OSM	BAY	RCM	PI3K	MEK				OSM	BAY	RCM	PI3K	MEK				OSM	BAY	RCM	PI3K	MEK				OSM	BAY	RCM	PI3K	MEK
Average	OSM							Average	OSM							Mean	OSM							Mean	OSM							Mean	OSM							Mean	OSM
	BAY	0.520871							BAY	1.12876							BAY	0.674393							BAY	0.964159							BAY	0.655469							BAY	0.859121
	RCM	0.739176	0.565541						RCM	1.09076	0.574682						RCM	0.732005	0.602971						RCM	0.867112	0.429148						RCM	0.719915	0.790961						RCM	0.85114	0.740261
	PI3K	0.790704	0.848145	0.860043					PI3K	1.02813	0.939153	1.01625					PI3K	1.06973	1.31396	1.80012					PI3K	1.20762	1.3245	0.895669					PI3K	0.925969	0.604062	0.943837					PI3K	0.904318	1.10489	1.0324
	MEK	0.97543	1.61165	1.19874	3.95044				MEK	1.59111	0.769462	1.00207	2.61073				MEK	1.18519	1.56506	5.52907	1.06102				MEK	1.02343	0.683346	0.899592	0.764719				MEK	0.970338	1.10132	0.833717	1.77792				MEK	1.18634	0.771503	1.0219	0.997789
		OSM	BAY	RCM	PI3K	MEK				OSM	BAY	RCM	PI3K	MEK				OSM	BAY	RCM	PI3K	MEK				OSM	BAY	RCM	PI3K	MEK				OSM	BAY	RCM	PI3K	MEK				OSM	BAY	RCM	PI3K	MEK
STDEV	OSM							STDEV	OSM							SD	OSM							SD	OSM							SD	OSM							SD	OSM
	BAY	0.204189							BAY	0.395224							BAY	0.0838896							BAY	0.0438392							BAY	0.104628							BAY	0.213919
	RCM	0.141602	0.199922						RCM	0.501753	0.0857857						RCM	0.0162126	0.209245						RCM	0.275497	0.151326						RCM	0.0904624	0.166017						RCM	0.13969	0.161144
	PI3K	0.137224	0.166686	0.14428					PI3K	0.533264	0.173394	0.103806					PI3K	0.0533077	0.665691	0.649351					PI3K	0.328323	0.97535	0.59203					PI3K	0.446361	0.461639	0.0349878					PI3K	0.166772	0.262193	0.102673
	MEK	0.204888	1.02695	1.16148	1.78437				MEK	0.727331	0.0545859	0.674127	0.446667				MEK	0.421148	1.18449	7.08455	0.571455				MEK	0.561586	0.898901	0.606677	0.573315				MEK	0.0269547	0.327781	0.147937	1.44884				MEK	0.335453	0.10257	0.0809669	0.00260642
		OSM	BAY	RCM	PI3K	MEK				OSM	BAY	RCM	PI3K	MEK				OSM	BAY	RCM	PI3K	MEK				OSM	BAY	RCM	PI3K	MEK				OSM	BAY	RCM	PI3K	MEK				OSM	BAY	RCM	PI3K	MEK
T-statistic	OSM							T-statistic	OSM							T-value	OSM							T-value	OSM							T-value	OSM							T-value	OSM
	BAY	-4.06425							BAY	0.564303							BAY	-6.72274							BAY	-1.41604							BAY	-5.70347							BAY	-1.14066
	RCM	-3.19034	-3.76399						RCM	0.31331	-8.58734						RCM	-28.6309	-3.28645						RCM	-0.835466	-6.53386						RCM	-5.36268	-2.1809						RCM	-1.84575	-2.79179
	PI3K	-2.64175	-1.57794	-1.68016					PI3K	0.0913772	-0.607803	0.271172					PI3K	2.2658	0.816876	2.1342					PI3K	1.09527	0.576264	-0.305233					PI3K	-0.287269	-1.48554	-2.78029					PI3K	-0.993728	0.692883	0.546567
	MEK	-0.207705	1.03161	0.296364	2.86393				MEK	1.40767	-7.31515	0.00532034	6.24596				MEK	0.761609	0.826265	1.10728	0.184936				MEK	0.0722693	-0.610146	-0.286664	-0.710811				MEK	-1.906	0.535389	-1.94684	0.929987				MEK	0.962152	-3.85852	0.468446	-1.46917
		OSM	BAY	RCM	PI3K	MEK				OSM	BAY	RCM	PI3K	MEK				OSM	BAY	RCM	PI3K	MEK				OSM	BAY	RCM	PI3K	MEK				OSM	BAY	RCM	PI3K	MEK				OSM	BAY	RCM	PI3K	MEK
***
Significant	OSM							Significant	OSM							significant	OSM							significant	OSM							significant	OSM							significant	OSM
	BAY	yes							BAY								BAY	yes							BAY		yes						BAY	yes							BAY
	RCM	yes	yes						RCM		yes						RCM	yes	yes						RCM								RCM	yes							RCM
	PI3K								PI3K								PI3K								PI3K								PI3K								PI3K
	MEK								MEK		yes						MEK								MEK								MEK								MEK		yes
		OSM	BAY	RCM	PI3K	MEK				OSM	BAY	RCM	PI3K	MEK				OSM	BAY	RCM	PI3K	MEK				OSM	BAY	RCM	PI3K	MEK				OSM	BAY	RCM	PI3K	MEK				OSM	BAY	RCM	PI3K	MEK
*** For significance on a 1-tailed T Test with an alpha=0.05 , a T-value < -2.919986 indicates significance with a sample size of 3

## Sheet: Fig 7C and D
	2 Drug OSM v BAY								2 Drug OSM v RCM								2 Drug BAY v RCM
	Osimertinib	100	66	50	34	0			Osimertinib	100	66	50	34	0			BAY-293	100	66	50	34	0
	BAY-293	0	34	50	66	100			RMC-4550	0	34	50	66	100			RMC-4550	0	34	50	66	100
Osimertinib IC50	Trial 1	2.357	0.97878	0.782	0.9095	0		Osimertinib IC50	Trial 1	2.357	0.39402	0.3822	0.25466	0		BAY-293 IC50	Trial 1	1.251	0.12969	0.0921	0.054094	0
	Trial 2	2.681	1.02894	0.858	0.52938	0			Trial 2	2.681	0.9471	0.7245	0.38998	0			Trial 2	1.695	0.431904	0.32665	0.100402	0
	Trial 3	2.888	1.28832	1.0015	0.71536	0			Trial 3	2.888	0.97284	0.69	0.37842	0			Trial 3	1.874	0.380358	0.35395	0.14365	0
	Average	2.642	1.09868	0.8805	0.71808	0			Average	2.642	0.77132	0.5989	0.34102	0			Average	1.60667	0.313984	0.257567	0.099382	0
	SD	0.26764	0.166137	0.111466	0.190075	0			SD	0.26764	0.327005	0.188459	0.075013	0			SD	0.320756	0.161671	0.143947	0.0447867	0
BAY-293 IC50	Trial 1	0	0.108664	0.16915	0.381282	1.251		RMC-4550 IC50	Trial 1	0	4.3792	8.29	10.6986	15.07		RMC-4550 IC50	Trial 1	0	6.681	9.21	10.5006	15.07
	Trial 2	0	0.246024	0.40115	0.480612	1.695			Trial 2	0	4.879	7.245	7.5702	13.12			Trial 2	0	4.8076	6.99	4.19958	13.12
	Trial 3	0	0.30974	0.46725	0.649506	1.874			Trial 3	0	5.134	6.9	7.3458	12.8			Trial 3	0	4.199	7.575	5.99874	12.8
	Average	0	0.221476	0.34585	0.5038	1.60667			Average	0	4.7974	7.47833	8.5382	13.6633			Average	0	5.2292	7.925	6.89964	13.6633
	SD	0	0.102761	0.156555	0.135607	0.320756			SD	0	0.383959	0.723781	1.87432	1.22867			SD	0	1.2936	1.15064	3.24568	1.22867
	Osimertinib		66	50	34				Osimertinib		66	50	34				Osimertinib		66	50	34
	BAY-293		34	50	66				RMC-4550		34	50	66				RMC-4550		34	50	66
Combination Index	Trial 1		0.502127	0.46699	0.690654			Combination Index	Trial 1		0.457761	0.712255	0.817971			Combination Index	Trial 1		0.547	0.684769	0.740029
	Trial 2		0.528937	0.556697	0.481003				Trial 2		0.725139	0.822445	0.722458				Trial 2		0.621244	0.725488	0.379324
	Trial 3		0.611377	0.596113	0.594289				Trial 3		0.73795	0.777982	0.704922				Trial 3		0.531013	0.780671	0.545306
	Average		0.54748	0.539933	0.588649				Average		0.640283	0.770894	0.74845				Average		0.566419	0.730309	0.554886
	SD		0.0569368	0.0661738	0.104939				SD		0.158199	0.0554362	0.0608418				SD		0.0481478	0.0481324	0.180543
T-Value			-13.7659	-12.0419	-6.78948			T-Value			-3.93839	-7.1582	-7.16115			T-Value			-15.5975	-9.70486	-4.27022
Significant?			yes	yes	yes			Significant?			yes	yes	yes			Significant?			yes	yes	yes
*** For significance on a 1-tailed T Test , T-value < -2.919986 indicates significance with a sample size of 3
	3 Drug OSM/BAY mix vs RCM								3 Drug OSM/RCM mix v BAY								3 Drug OSM/RCM mix v BAY
	Osimertinib	50	33	25	17	0			Osimertinib	50	33	25	17	0			Osimertinib	0	34	50	66	100
	BAY-293	50	33	25	17				BAY-293	0	34	50	66	100			BAY-293	50	33	25	17	0
	RMC-4550	0	34	50	66	100			RMC-4550	50	33	25	17	0			RMC-4550	50	33	25	17	0
OSM/BAY mix IC50	Trial 1	1.564	0.484308	0.33545	0.216376	0		OSM/RCM mix IC50	Trial 1	7.644	4.81932	2.064	5.0592	0		BAY/RCM mix IC50	Trial 1	1.842	0.87978	0.9105	0.61812	0
	Trial 2	1.716	0.70752	0.5535	0.283798	0			Trial 2	14.49	7.9332	7.035	5.5386	0			Trial 2	1.398	0.8085	0.5975	0.57494	0
	Trial 3	2.003	0.91278	0.5155	0.35292	0			Trial 3	13.8	8.7648	8.775	4.7872	0			Trial 3	1.515	0.97416	0.696	0.4709	0
	Average	1.761	0.701536	0.46815	0.284365	0			Average	11.978	7.17244	5.958	5.12833	0			Average	1.585	0.88748	0.734667	0.554653	0
	SD	0.222933	0.214299	0.116482	0.0682738	0			SD	3.76918	2.07985	3.48272	0.380441	0			SD	0.230128	0.083098	0.160042	0.0756776	0
RMC-4550 IC50	Trial 1	0	5.3822	7.255	9.0486	15.07		BAY-293 IC50	Trial 1	0	0.053244	0.044475	0.234234	1.251		Osimertinib IC50	Trial 1	0	0.209882	0.4212	0.556446	2.357
	Trial 2	0	3.6448	5.535	5.50902	13.12			Trial 2	0	0.19023	0.3283	0.50226	1.695			Trial 2	0	0.4165	0.5975	1.11606	2.681
	Trial 3	0	4.7022	5.155	6.8508	12.8			Trial 3	0	0.21029	0.40945	0.434676	1.874			Trial 3	0	0.50184	0.696	0.9141	2.888
	Average	0	4.5764	5.98167	7.13614	13.6633			Average	0	0.151255	0.260742	0.39039	1.60667			Average	0	0.376074	0.571567	0.862202	2.642
	SD	0	0.875505	1.11899	1.78696	1.22867			SD	0	0.0854703	0.191637	0.139393	0.320756			SD	0	0.150119	0.139223	0.283394	0.26764
	Osimertinib		66	50	34				Osimertinib		66	50	34				Osimertinib		66	50	34
	RMC-4550		34	50	66				RMC-4550		34	50	66				RMC-4550		34	50	66
Combination Index	Trial 1		0.666806	0.695902	0.738786			Combination Index	Trial 1		0.673032	0.305567	0.84909			Combination Index	Trial 1		0.566668	0.673001	0.571652
	Trial 2		0.690113	0.744427	0.585278				Trial 2		0.659725	0.679195	0.678555				Trial 2		0.733679	0.650261	0.827544
	Trial 3		0.823066	0.660098	0.711414				Trial 3		0.747345	0.854359	0.578849				Trial 3		0.816777	0.700403	0.627342
	Average		0.726662	0.700143	0.678493				Average		0.693367	0.61304	0.702165				Average		0.705708	0.674555	0.675513
	SD		0.0842978	0.0423242	0.081878				SD		0.0472171	0.280313	0.136658				SD		0.127379	0.0251072	0.134575
T-Value			-5.61623	-12.2712	-6.80117			T-Value			-11.2481	-2.39102	-3.77486			T-Value			-4.00167	-22.4512	-4.17632
Significant?			yes	yes	yes			Significant?			yes	yes	yes			Significant?			yes	yes	yes
*** For significance on a 1-tailed T Test with an alpha=0.05 , a T-value < -2.919986 indicates significance with a sample size of 3

## Sheet: Fig 7E
Osimertinib	66	50	34		66	50	34		0	0	0		33
BAY-293	34	50	66		0	0	0		34	50	66		33
RMC-4550	0	0	0		34	50	66		66	50	34		33
Trial 1	0.502127	0.46699	0.690654		0.457761	0.712255	0.817971		0.547	0.684769	0.740029		0.501643
													0.507101
													0.638811
Trial 2	0.528937	0.556697	0.481003		0.725139	0.822445	0.722458		0.621244	0.725488	0.379324		0.487715
													0.562515
													0.606335
Trial 3	0.611377	0.596113	0.594289		0.73795	0.777982	0.704922		0.531013	0.780671	0.545306		0.416107
													0.574619
													0.675381
mean	0.54748	0.539933	0.588649		0.640283	0.770894	0.74845		0.566419	0.730309	0.554886		0.552247
SD	0.0569368	0.0661738	0.104939		0.158199	0.0554362	0.0608418		0.0481478	0.0481324	0.180543		0.081765
T-Value	-13.7659	-12.0419	-6.78948		-3.93839	-7.1582	-7.16115		-15.5975	-9.70486	-4.27022		-16.4283
Significant?	yes	yes	yes		yes	yes	yes		yes	yes	yes		yes
*** For significance on a 1-tailed T Test with an alpha=0.05, a T-value < -2.919986 indicates significance with a sample size of 3
*** For significance on a 1-tailed T Test with an alpha=0.05 , a T-value < -1.859548 indicates significance with a sample size of 9
