# Supplementary material for: Marked synergy by vertical inhibition of EGFR signaling in NSCLC spheroids shows SOS1 is a therapeutic target in EGFR-mutated cancer
Source: eLife. 2020 Sep 8;9:e58204. doi: 10.7554/eLife.58204 (PMC7478890; doi:10.7554/eLife.58204)
Supplement: Source data 1. [file elife-58204-data1.xlsx]

## Sheet: Sheet1
HCC827				H1975			PC9				PC9-TM			H3255				H3255-TM
Osimertinib	BAY-293	Gefitinib		Osimertinib	BAY-293		Osimertinib	BAY-293	Gefitinib		Osimertinib	BAY-293		Osimertinib	BAY-293	Gefitinib		Osimertinib	BAY-293
-1.191	-0.6079	-1.605		-1.016	-1.792		-1.342	-0.9102	-1.255		-3.734	-1.674		-2.036	-1.247	-1.381		-1.341	-2.028
-1.251	-1.036	-2.051		-1.258	-2.053		-1.308	-0.543	-1.917		-3.769	-2.733		-1.467	-1.729	-1.468		~ -0.03840
-3.071	-0.5756	-2.292		-2.03	-0.8477		-0.4585	-0.7507	-0.6135		-1.55	-6.791		-1.363	-1.712	-1.332		~ -0.07509	~ -0.2630
-1.294	-1.699	-2.216		-0.8848	-0.678		-1.596	-1.099	-1.662		-3.257	-2.302		-1.186	-1.231	-1.169		-1.691	~ -0.3724
-1.818	-1.715			-1.669	-0.581						-1.686	-0.5217		-1.494	-1.075	-1.304
-2.728	-1.5			-1.669	-0.6163						-0.5146	-0.3074			-1.56	-1.847
-0.8474	-3.618			-1.383	-1.827						-0.5642	-0.4559			-1.177	-1.204
-1.689	-1.637			-1.329	-1.424						-0.4604	-2.073
-3.932	-1.52			-0.9294	-1.266						-2.347	-1.03
-1.98016	-1.54539	-2.041		-1.35202	-1.23167		-1.17613	-0.825725	-1.36187		-1.98691	-1.98756		-1.5092	-1.39014	-1.38643		-1.516	-2.028
1.03552	0.897081	0.307583		0.384179	0.574149		0.495374	0.236204	0.568544		1.35897	2.00212		0.318341	0.270132	0.226981		0.247487	#DIV/0!
-1.98	-1.55	-2.04		-1.29	-1.23		-1.18	-0.83	-1.36		-2.09	-1.99		-1.51	-1.39	-1.39		-0.64	-0.87
1.04	0.9	0.31		0.39	0.57		0.5	0.24	0.57		1.02	0.83		0.32	0.27	0.23		0.35	0.52
